# Supplementary material for: Microbiota-based markers predictive of development of Clostridioides difficile infection
Source: PubMed Central journal article supplement (PMC8047037; doi:10.1038/s41467-021-22302-0), 2021-04-14
Supplement: 41467_2021_22302_MOESM1_ESM.pdf [file 41467_2021_22302_MOESM1_ESM.pdf]

1 **Supplementary Information**

2 **Microbiota-based markers predictive of development of *Clostridioides difficile* infection**

3 Matilda Berkell<sup>1</sup>, Mohamed Mysara<sup>1,2</sup>, Basil Britto Xavier<sup>1</sup>, Cornelis H. van Werkhoven<sup>3</sup>,  
4 Pieter Monsieurs<sup>2,4</sup>, Christine Lammens<sup>1</sup>, Annie Ducher<sup>5</sup>, Maria J.G.T. Vehreschild<sup>6,7,8</sup>,  
5 Herman Goossens<sup>1</sup>, Jean de Gunzburg<sup>5</sup>, Marc J.M. Bonten<sup>3,9</sup>, Surbhi Malhotra-Kumar<sup>1\*</sup>, the  
6 ANTICIPATE study group<sup>10</sup>

7 <sup>1</sup> Laboratory of Medical Microbiology, Vaccine & Infectious Disease Institute, University of  
8 Antwerp, Universiteitsplein 1, 2610 Wilrijk, Belgium

9 <sup>2</sup> Microbiology Unit, Interdisciplinary Biosciences, Belgian Nuclear Research Centre, SCK–  
10 CEN, Boeretang 200, 2400 Mol, Belgium

11 <sup>3</sup> Julius Center for Health Sciences and Primary Care, University Medical Center Utrecht,  
12 Utrecht University, Heidelberglaan 100, 3584 CX Utrecht, the Netherlands

13 <sup>4</sup> Department of Biomedical Sciences, Institute of Tropical Medicine, Antwerp, Belgium <sup>5</sup>  
14 Da Volterra, 172 rue de Charonne, 75011 Paris, France;

15 <sup>6</sup> Department of Internal Medicine, Center for Integrated Oncology Aachen Bonn Cologne  
16 Duesseldorf, University of Cologne 50924 Cologne, Germany

17 <sup>7</sup> German Centre for Infection Research (DZIF), partner site Bonn-Cologne, Germany

18 <sup>8</sup> University Hospital Frankfurt, Department of Internal Medicine, Infectious Diseases, Goethe  
19 University Frankfurt, 60590 Frankfurt am Main, Germany

20 <sup>9</sup> Department of Medical Microbiology, University Medical Center Utrecht, Utrecht  
21 University, Heidelberglaan 100, 3584 CX Utrecht, the Netherlands

22 <sup>10</sup> The ANTICIPATE study group investigators are listed at the end of the manuscript

23 \*Corresponding author, email: [surbhi.malhotra@uantwerpen.be](mailto:surbhi.malhotra@uantwerpen.be)

24 These authors contributed equally: Matilda Berkell, Mohamed Mysara, Basil Britto Xavier

25 **Table of contents**

26 Ethics committees ..... 3

27 Supplementary Results ..... 5

28 Evaluation of baseline characteristics of enrolled patients ..... 5

29 High-resolution 16S rRNA gene sequence analysis reveals concealed diversity in an OTU  
30 classified as *Clostridium XI*..... 6

31 LEfSe analyses ..... 7

32 Investigation into the prevalence of one OTU classified as *Sphingomonas* ..... 7

33 Patients developing CDI undergo large alterations in microbiota composition..... 8

34 Quality controls ..... 9

35 Investigation into the effect of sequencing chemistry ..... 10

36 Supplementary Methods ..... 11

37 PCR amplification of the 16S rRNA V3-V4 regions ..... 11

38 Supplementary Tables..... 12

39 Supplementary Figures ..... 30

40 Supplementary References..... 38

41

42 **Ethics committees**

43 **Netherlands:** local medical ethics committee approval

- 44 • UMC Utrecht

45 **Germany:** local medical ethics committee approvals

- 46 • UKK Uniklinik Köln
- 47 • Universitätsklinikum Heidelberg (KLIPPS)
- 48 • Jena University Hospital
- 49 • UK-SH (UZL) Universitätsklinikum Schleswig-Holstein, Campus Lübeck
- 50 • Klinikum der Universität München
- 51 • Universitätsklinikum Leibzig
- 52 • University of Aachen
- 53 • Universitätsklinikum Essen

54 **Greece:** local medical ethics committee approvals

- 55 • University Hospital of Heraklion
- 56 • Laiko General Hospital
- 57 • Attikon University General Hospital
- 58 • Evangelismos General Hospital of Athens
- 59 • Ippokrateio General Hospital of Athens

60 **Spain:** Central approvals:

- 61 • Comité Coordinador de Ética de la Investigación Biomédica de Andalucía
- 62 • Dirección General de Inspección y Ordenación CONSEJERÍA DE SANIDAD
- 63 Comunidad de Madrid
- 64 • Local medical ethics committee approvals
- 65 • Hospital Universitari de Bellvitge
- 66 • Hospital Universitario 12 de Octubre
- 67 • Hospital Universitario Gregorio Marañón
- 68 • Hospital Universitario Ramon y Cajal
- 69 • Hospital Universitario Virgen Macarena
- 70 • Hospital Universitari Vall d'Hebrón
- 71 • Servicio Andaluz de Salud- Reina Sofia University Hospital

72 **Romania:** Central approval:

- 73 • Ministry of Health, National Agency for Medicines and Medical Devices
- 74 • Local medical ethics committee approvals
- 75 • Infectious and Tropical Diseases Hospital “Dr. Victor Babes”
- 76 • Clinical Hospital Of Infectious Diseases Of Iasi
- 77 • The National Institute of Infectious Diseases Matei Bals
- 78 • Cluj Napoca Infectious disease Clinical Hospital
- 79 • Oncology Institute Ion Chiricuta

80 **France:** Central approvals:

- 81 • ANSM (Agence nationale de sécurité du médicament et des produits de santé)
- 82 • Comité de protection des personnes du Sud-Ouest et outre-mer IV, Limoges

## 83 **Supplementary Results**

### 84 Evaluation of baseline characteristics of enrolled patients

85 Assessment of impact of baseline characteristics on microbial composition in hospitalized  
86 patients are summarized in this section. Many baseline characteristics such as hospitalization  
87 ward, hospitalization reason, comorbidities etc. were explored. However, it was difficult to  
88 divide patients into groups based on e.g. comorbidities as most have more than one and were  
89 thus not explored further. Similarly, other characteristics did not provide large enough groups  
90 to enable comparison and were therefore not explored further.

91 The largest differences were observed between patients based on country of origin and age.  
92 Overall, patients from different countries showed distinct differences in alpha diversity  
93 (Shannon:  $p < 0.001$ , Chao1:  $p < 0.001$ ), where the microbial diversity in Romanian patients  
94 were particularly distinct (Supplementary Table 1). Further exploration of structural changes  
95 confirmed that Romanian patients have a unique microbial composition compared to that of  
96 countries, and a microbiota enriched in Ruminococcaceae, *Faecalibacterium*, and *Roseburia*  
97 compared to all others (Supplementary Figure 1a). When comparing patients based on gender,  
98 no distinct differences were observed in alpha diversity whereas slight compositional  
99 differences were observed (Supplementary Table 1). Male study participants displayed higher  
100 levels of Prevotellaceae, Bacteroidetes, Clostridiales Incertae Sedix XI, and *Fingoldia*  
101 whereas female participants had higher levels of Proteobacteria, Sphingomonadales,  
102 Lachnospiraceae, and *Faecalibacterium* (Supplementary Figure 1b).

103 High-resolution 16S rRNA gene sequence analysis reveals concealed diversity in an OTU  
104 classified as *Clostridium XI*  
105 Clustering of short 16S rRNA gene sequencing reads at 97% does not guarantee single-  
106 species resolution within an OTU<sup>1</sup>. At this cutoff, 58.8% (n = 556) of the patients at D1  
107 harbored reads clustered into one OTU classified as *Clostridium XI* containing all pure *C.*  
108 *difficile* reads verified by sequencing of positive controls. This far exceeds *C. difficile* carriage  
109 rates reported both in hospitals and the community (7–18% and 2–4%, respectively)<sup>2</sup>.  
110 Therefore, for high-resolution analysis it was necessary to perform oligotyping<sup>3</sup>, which  
111 revealed that this OTU consisted of two distinct sequence types distinguished by 6 nucleotides  
112 corresponding to two organisms, *C. difficile* and *Clostridium bartlettii*, where the latter is also  
113 an anaerobic occupant of the human intestine<sup>4</sup>. Both organisms were identified with 100%  
114 sequence length and identity with no other closely-related hits. *C. bartlettii* is a sporulating  
115 anaerobic occupant of the human intestine with limited genome similarity to *C. difficile* but  
116 sharing some common phenotypic functions and, importantly, a 16S rRNA gene similarity of  
117 > 97% in the V3–V4 region<sup>4–6</sup>. Thus, when investigating single species in short-read 16S  
118 data, high-resolution analysis tools such as oligotyping<sup>3</sup>, DADA2<sup>7</sup>, or Resphera<sup>8</sup> are  
119 recommended to avoid overestimating carrier rates due to insufficient resolution in addition to  
120 previously known limitations of species delineation using short-read sequencing, such as  
121 insufficient sequencing depth and sampling techniques<sup>8</sup>. Overall, 82.6% of the reads in this  
122 OTU were classified as *C. bartlettii* rendering *C. bartlettii* 4.7 times more frequent than *C.*  
123 *difficile* in this patient cohort. Furthermore, it was found that the *C. bartlettii* / *C. difficile* read  
124 ratio within this OTU varied widely between patients (14.78 on average, SD = 35.06).

125 LefSe analyses

126 Linear Discriminant Analysis Effect Size (LefSe) was performed on D1 samples in order to  
127 identify possible microbiota-based markers that could be used for prediction of CDI and  
128 AAD. Three comparisons were made of the samples (Supplementary Table 2); CDI vs non-  
129 CDI patients to enable prediction of CDI (Supplementary Table 3), diarrheic vs. ND patients  
130 to enable prediction of development of antibiotic-associated diarrhea (Supplementary Table  
131 4), and a three-way comparison of AAD, CDI, and ND patients in order to distinguish the  
132 three patient groups from each other (Table 2). The ability for prediction of the output was  
133 assessed by regression modelling with competing events as described in van Werkhoven *et*.  
134 *al.*<sup>9</sup>.

135 Investigation into the prevalence of one OTU classified as *Sphingomonas*

136 In several of the investigated antibiotic groups, we observed an increase in relative abundance  
137 of *Sphingomonas* at D6. *Sphingomonas* spp. are unlikely occupants of the human intestine as  
138 this genus constitutes strictly aerobic bacteria commonly occurring in the environment.  
139 Previous reports indicate that the occurrence of this genus can be observed after 16S rRNA  
140 gene sequencing in samples with low biomass input or arise due to contaminations in PCR or  
141 DNA extraction reagent kits<sup>10-14</sup>. In total 42 samples were identified with a high relative  
142 abundance of this OTU in the whole sample collection. To exclude this as an introduced  
143 contamination by sample handling, samples with a high relative abundance were evaluated  
144 based on sampling site, DNA extraction date, DNA concentration, DNA extraction kit lot  
145 number, and sequencing date and batch. It was found that these samples could be linked to a  
146 few sequencing batches in which the negative controls displayed this same OTU. After an  
147 extensive evaluation of potential contaminating factors within the identified batches, no  
148 conclusive evidence was found as not all samples in any one batch showed presence of

149 *Sphingomonas* and no clear links to any day, date or DNA extraction or sequencing kit, or to  
150 any personnel handling of the samples could be identified.

151 Patients developing CDI undergo large alterations in microbiota composition

152 Differences in alpha diversity and microbial composition were less pronounced between  
153 sampling points for patients developing CDI compared to those who developed AAD  
154 (Supplementary Figure 6a-b), possibly due to the small number of sequenced stool samples (n  
155 = 6). Additionally, three patients developed CDI between the D1 and D6 sampling, possibly  
156 indicating an already disrupted microbiota at D1 due to CDI development. No distinct changes  
157 in alpha diversity were observed between the sampling points (Supplementary Figure 6a-b),  
158 and no distinct separation was observed between identified MDS clusters (Supplementary  
159 Figure 6c). The only taxa found to be distinctly elevated in CDI patients at the occurrence of  
160 diarrhea include cultured and uncultured members of the Lactobacillales order (Supplementary  
161 Figures 6d and 7).

162 Despite the lack of significant results for the CDI group, many similarities were observed  
163 between the AAD and CDI cases. At the occurrence of diarrhea, both microbiotas were vastly  
164 dominated by Firmicutes whereas the abundance of Bacteroidetes and Proteobacteria was  
165 decreased. The CDI microbiota showed higher levels of Firmicutes and lower levels of  
166 Proteobacteria compared to the AAD microbiota. The CDI microbiota additionally showed  
167 higher abundance of the genera *Clostridium XI*, *Enterococcus*, and *Lactococcus*, as well as  
168 uncultured Lachnospiraceae, and largely lower abundance of *Faecalibacterium*, *Bacteroides*,  
169 and *Prevotella* spp. AAD patients similarly suffered from high levels of *Enterococcus*, and with  
170 large reductions in *Prevotella*. AAD patients, had higher baseline levels of *Prevotella* and  
171 *Escherichia/Shigella* compared to CDI, which were both reduced at the time of occurrence.



172 CDI patients largely lacked *Escherichia/Shigella* altogether at baseline, but the abundance at  
173 the time of occurrence were similar to that of AAD. Other highly abundant genera at the  
174 instance of AAD included *Klebsiella*, *Lactobacillus*, and *Streptococcus*, which were all largely  
175 absent in the CDI microbiota.

#### 176 Quality controls

177 All analyzed samples were sequenced across 14 batches which generated 80,145 raw reads on  
178 average (1-1,343,946, Supplementary Figure 8a). Pre-processing of the raw reads resulted in  
179 the removal of 21% and 35% on average for quality filtering (primer mismatches, ambiguity,  
180 post-assembly, etc.) and chimera removal, respectively (Supplementary Figure 8b). Read  
181 quality was evaluated using Phred scores (Supplementary Figure 10), which reported a high  
182 level of similarity between batches. After processing of the reads, rarefaction curves were  
183 calculated to evaluate sequencing depth (Supplementary Figure 9). A subsampling depth of  
184 15,000 reads was selected to ensure OTU stability while minimizing the number of discarded  
185 samples for analysis. The coverage was calculated using

$$186 \quad C = 1 - \frac{n_1}{N}$$

187  $n_1$  = number of OTUs,  $N$  = total number of individuals in the sample).

188 The estimated coverage of 99.8% of the chosen subsampling depth was considered sufficient  
189 for the analysis in this study, and subsequently applied to all samples for further analysis to  
190 avoid sample size dependencies in the diversity assessment. In addition to raw read quality  
191 controls, several control samples were included to ensure study reproducibility. Four *C.*  
192 *difficile* isolates were processed as positive controls which showed that > 99.0% of the reads  
193 were clustered into the same OTU classified as *Clostridium XI*. Inclusion of mock  
194 communities (HM-783D, <https://www.beiresources.org/>) in different sequencing batches

195 showed an error rate of 0.01% and a Pearson correlation of > 98.0% (Supplementary Figure  
196 11). Negative DNA extraction controls in the form of blank transport medium was processed  
197 as negative sample controls in the sequencing reactions. These samples consisted mainly of  
198 reads classified as *Sphingomonas*, *Phenylobacterium*, or unclassified bacteria (Supplementary  
199 Figure 12). Successfully sequenced samples were re-sequenced to serve as controls in several  
200 batches (Supplementary Figure 13) all showing a Pearson correlation > 95.0% with the  
201 original sample.

#### 202 Investigation into the effect of sequencing chemistry

203 In this study, two sequencing chemistries were utilized for the 16S rRNA gene profiling.  
204 Therefore, an investigation into potential systematic differences at the OTU level due to the  
205 V2 and V3 sequencing chemistries was conducted. First, all samples sequenced with each of  
206 the two chemistries were compared using LEfSe, which revealed that no OTU was detected to  
207 be differentially abundant between the V2 and V3 chemistries. Furthermore, some patient  
208 samples were sequenced in multiple batches in the form of positive controls to assess  
209 reproducibility and to ensure that there were no batch dependencies. Such sample controls  
210 that were sequenced with both V2 and V3 chemistry were compared, and showed a Pearson  
211 correlation of  $\geq 84.7\%$  (Supplementary Figure 14). Further, beta-diversity was compared  
212 between the sample controls using Principle Coordinate Analysis (Supplementary Figure 15).  
213 Expectedly, these did not show any tangible differences between the repeats, indicating that  
214 there is no major differences in community composition between the two sequencing  
215 technologies.

216 **Supplementary Methods**

217 PCR amplification of the 16S rRNA V3-V4 regions

218 PCR was performed with 400 nM each of 341F and 802R primers with Illumina overhang  
219 adapters (Supplementary Table 11), in a total volume of 25 µl together with 2 µl extracted  
220 DNA, 0.03 µl 15 U/µl Super Taq Polymerase (SphaeroQ, Gorinchem, the Netherlands), and  
221 2.5 µl 10x Super Taq buffer with 15 mM MgCl<sub>2</sub> (SphaeroQ, Gorinchem, the Netherlands)  
222 amplified with the temperature profile: 95°C for 5 min, followed by 25 cycles of 95°C for 30  
223 s, 60°C for 30 s, 72°C for 1 min, and final extension at 72°C for 10 min. Successful  
224 amplification was confirmed with electrophoresis in 1.5 % agarose gel at 150 V for 50 min. In  
225 case of a negative PCR, samples were excluded from library preparation and the PCR  
226 repeated. Libraries were prepared with the Nextera XT kit (Illumina Inc., San Diego, USA) of  
227 and sequenced with 2 x 250 or 2 x 300 paired-end sequencing using V2 or V3 chemistry on a  
228 MiSeq instrument (Illumina Inc., San Diego, USA).

229 **Supplementary Tables**

230 **Supplementary Table 1: Assessment of the impact of baseline characteristics on microbial**  
 231 **diversity**

| Hypothesis        | Statistical test  | Alpha diversity |               | Beta diversity |
|-------------------|-------------------|-----------------|---------------|----------------|
|                   |                   | Shannon p-value | Chao1 p-value | AMOVA p-value  |
| Gender            |                   |                 |               |                |
| F-M               | Wilcoxon rank sum | NS              | NS            | <0.001         |
| Country of origin |                   |                 |               |                |
| FR-GE-GR-NL-RO-SP | Kruskal-Wallis    | 1.12E-05        | 9.99E-07      | <0.001         |
| FR-GE             | Wilcoxon rank sum | NS              | 2.21E-04      | <0.001         |
| FR-GR             | Wilcoxon rank sum | NS              | NS            | <0.001         |
| FR-NL             | Wilcoxon rank sum | NS              | NS            | 0.023          |
| FR-RO             | Wilcoxon rank sum | 0.034           | NS            | <0.001         |
| FR-SP             | Wilcoxon rank sum | NS              | NS            | <0.001         |
| GE-GR             | Wilcoxon rank sum | NS              | NS            | <0.001         |
| GE-NL             | Wilcoxon rank sum | NS              | NS            | NS             |
| GE-RO             | Wilcoxon rank sum | 8.18E-05        | 1.03E-05      | <0.001         |
| GE-SP             | Wilcoxon rank sum | NS              | NS            | <0.001         |
| GR-NL             | Wilcoxon rank sum | NS              | NS            | 0.014          |
| GR-RO             | Wilcoxon rank sum | NS              | NS            | <0.001         |
| GR-SP             | Wilcoxon rank sum | NS              | NS            | 0.001          |
| NL-RO             | Wilcoxon rank sum | NS              | NS            | <0.001         |
| NL-SP             | Wilcoxon rank sum | NS              | NS            | 0.016          |
| RO-SP             | Wilcoxon rank sum | 1.85E-05        | 0.005         | <0.001         |
| Age by decade     |                   |                 |               |                |
| 50-60-70-80-90    | Kruskal-Wallis    | 0.034           | NS            | <0.001         |
| 50-60             | Wilcoxon rank sum | 0.032           | -             | 0.001          |
| 50-70             | Wilcoxon rank sum | NS              | -             | <0.001         |
| 50-80             | Wilcoxon rank sum | NS              | -             | <0.001         |
| 50-90             | Wilcoxon rank sum | NS              | -             | 0.005          |
| 60-70             | Wilcoxon rank sum | NS              | -             | NS             |
| 60-80             | Wilcoxon rank sum | NS              | -             | <0.001         |
| 60-90             | Wilcoxon rank sum | NS              | -             | NS             |
| 70-80             | Wilcoxon rank sum | NS              | -             | 0.014          |
| 70-90             | Wilcoxon rank sum | NS              | -             | NS             |
| 80-90             | Wilcoxon rank sum | NS              | -             | NS             |

233 Differences in alpha and beta diversity between patients in relation to baseline characteristics  
 234 were assessed at D1 for enrolled patients in the study (n = 945). Specifically, differences in  
 235 alpha diversity by gender, country of origin, and age by decades were assessed using non-  
 236 parametric Kruskal-Wallis or two-sided Wilcoxon rank sum tests followed by Bonferroni  
 237 correction of p-values as appropriate. Differences in microbial composition were determined  
 238 using AMOVA based on the Jaccard beta-diversity index. Only p-values < 0.05 are reported.  
 239 NS: Non-significant. -: Comparison not performed due to non-significant Kruskal-Wallis

240 comparison. M: Male. F: Female. FR: France. GE: Germany. GR: Greece. NL: the  
 241 Netherlands. RO: Romania. SP: Spain. 50: patients aged 50-59. 60: patients aged 60-69. 70:  
 242 patients aged 70-79. 80: patients aged 80-89. 90: patients aged 90-99. D1: rectal swab sample  
 243 collected upon study enrollment. AMOVA: Analysis of molecular variance.

244 **Supplementary Table 2: Patient groups used for microbiota-based biomarker**  
 245 **identification at D1**

|                    |           |     |
|--------------------|-----------|-----|
| CDI vs. non-CDI    | CDI       | 14  |
|                    | Non-CDI   | 733 |
|                    | Excluded* | 198 |
| Diarrhea vs. ND    | Diarrhea  | 129 |
|                    | ND        | 669 |
|                    | Excluded* | 147 |
| AAD vs. CDI vs. ND | AAD       | 64  |
|                    | CDI       | 14  |
|                    | ND        | 669 |

246 \*: Patients excluded due to loss of follow-up or lack of CDI testing where required. AAD:  
 247 patients with non-*C. difficile* antibiotic-associated diarrhea. CDI: patients with confirmed *C.*  
 248 *difficile* infection. ND: non-diarrheic patients. Non-CDI: patients with non-*C. difficile*  
 249 diarrhea or non-diarrheic patients. Diarrhea: patients with diarrhea regardless of testing of  
 250 CDI status. D1: rectal swab sample collected upon study enrollment.

251 **Supplementary Table 3: Identification of microbiota-based biomarkers in patients**  
 252 **developing CDI compared to non-CDI patients at D1**

| Class   | OTU     | LDA  | p-value | Taxonomy                   |
|---------|---------|------|---------|----------------------------|
| CDI     | Otu1    | 4.27 | 0.0001  | <i>Enterococcus</i>        |
|         | Otu9    | 4.32 | 0.0200  | <i>Finegoldia</i>          |
| Non-CDI | Otu30   | 3.83 | 0.0076  | <i>Blautia</i>             |
|         | Otu31   | 3.53 | 0.0059  | <i>Ruminococcus2</i>       |
|         | Otu56   | 3.77 | 0.0253  | <i>Porphyromonas</i>       |
|         | Otu280  | 3.53 | 0.0411  | <i>Bifidobacterium</i>     |
|         | Otu64   | 3.59 | 0.0320  | <i>Ezakiella</i>           |
|         | Otu69   | 3.63 | 0.0164  | <i>Porphyromonas</i>       |
|         | Otu68   | 3.35 | 0.0379  | <i>Alistipes</i>           |
|         | Otu648  | 3.29 | 0.0156  | <i>Blautia</i>             |
|         | Otu106  | 3.18 | 0.0117  | Uncultured Clostridiales   |
|         | Otu2540 | 3.40 | 0.0263  | <i>Ruminococcus</i>        |
|         | Otu137  | 3.14 | 0.0487  | Uncultured Lachnospiraceae |
|         | Otu974  | 3.02 | 0.0032  | <i>Roseburia</i>           |
|         | Otu262  | 2.84 | 0.0020  | <i>Butyricoccus</i>        |
|         | Otu2858 | 2.85 | 0.0272  | Uncultured Lachnospiraceae |
|         | Otu294  | 2.79 | 0.0403  | Uncultured Lachnospiraceae |
|         | Otu300  | 2.79 | 0.0496  | <i>Odoribacter</i>         |
|         | Otu399  | 2.86 | 0.0214  | Uncultured Ruminococcaceae |

253 The microbiota of patients developing CDI (n = 14) and of non-CDI patients (n = 733) was  
 254 compared to identify predictive biomarkers at D1. Distinctly abundant OTUs associated with  
 255 each group was identified using linear discriminant analysis effect size (LEfSe, LDA > 2.0).

256 CDI: patients with confirmed *C. difficile* infection. Non-CDI: patients with non-*C. difficile*  
257 diarrhea or non-diarrheic patients. D1: rectal swab sample collected upon study enrollment.  
258 LDA: Linear discriminant analysis score. OTU: Operational taxonomic unit.

259 **Supplementary Table 4: Identification of microbiota-based biomarkers in diarrheic**  
 260 **patients compared to ND patients at D1**

| Class    | OTU     | LDA  | p-value | Taxonomy                   |
|----------|---------|------|---------|----------------------------|
| Diarrhea | Otu1    | 3.58 | 0.0034  | <i>Enterococcus</i>        |
|          | Otu18   | 3.42 | 0.0324  | <i>Prevotella</i>          |
|          | Otu21   | 3.23 | 0.0046  | Uncultured Lachnospiraceae |
|          | Otu1392 | 3.31 | 0.0115  | <i>Clostridium XIVa</i>    |
|          | Otu122  | 3.38 | 0.0301  | <i>Veillonella</i>         |
|          | Otu162  | 2.47 | 0.0092  | <i>Clostridium XVIII</i>   |
| ND       | Otu25   | 3.66 | 0.0133  | <i>Campylobacter</i>       |
|          | Otu37   | 3.58 | 0.0486  | Uncultured Clostridiales   |
|          | Otu56   | 3.48 | 0.0037  | <i>Porphyromonas</i>       |
|          | Otu252  | 2.77 | 0.0210  | <i>Ruminococcaceae</i>     |
|          | Otu60   | 2.86 | 0.0443  | <i>Mobiluncus</i>          |
|          | Otu64   | 3.11 | 0.0159  | <i>Ezakiella</i>           |
|          | Otu69   | 3.21 | 0.0049  | <i>Porphyromonas</i>       |
|          | Otu92   | 3.24 | 0.0042  | <i>Dialister</i>           |
|          | Otu648  | 3.02 | 0.0071  | <i>Blautia</i>             |
|          | Otu106  | 2.76 | 0.0071  | Uncultured Clostridiales   |
|          | Otu2540 | 3.02 | 0.0164  | <i>Ruminococcus</i>        |
|          | Otu127  | 3.13 | 0.0023  | <i>Oscillibacter</i>       |
|          | Otu708  | 2.51 | 0.0437  | <i>Blautia</i>             |
|          | Otu527  | 2.76 | 0.0089  | <i>Coprococcus</i>         |
|          | Otu974  | 2.74 | 0.0066  | <i>Roseburia</i>           |
|          | Otu399  | 2.74 | 0.0015  | Uncultured Ruminococcaceae |

261 The microbiota of patients developing diarrhea (n = 129) and of ND patients (n = 669) was  
 262 compared to identify predictive biomarkers at D1. Distinct OTUs associated with each  
 263 condition were identified using linear discriminant analysis effect size (LEfSe). An LDA >  
 264 2.0 and p < 0.05 was considered significant. ND: non-diarrheic patients. Diarrhea: patients  
 265 with diarrhea regardless of testing of CDI status. D1: rectal swab sample collected upon study  
 266 enrollment. LDA: Linear discriminant analysis score. OTU: Operational taxonomic unit.

267 **Supplementary Table 5: Identification of microbiota-based biomarkers for CDI patients**  
 268 **compared to AAD patients at D1**

| Class | OTU    | LDA  | p-value  | Taxonomy               |
|-------|--------|------|----------|------------------------|
| CDI   | Otu1   | 4.21 | 0.007057 | <i>Enterococcus</i>    |
|       | Otu9   | 4.29 | 0.021522 | <i>Finegoldia</i>      |
|       | Otu30  | 3.79 | 0.030027 | <i>Blautia</i>         |
| AAD   | Otu31  | 3.83 | 0.019412 | <i>Ruminococcus2</i>   |
|       | Otu280 | 3.59 | 0.038071 | <i>Bifidobacterium</i> |
|       | Otu262 | 2.76 | 0.009996 | <i>Butyricoccus</i>    |

269 The microbiota of patients developing CDI (n = 14) and AAD (n = 64) was compared to  
 270 identify predictive biomarkers at D1. Distinctly abundant OTUs associated with each  
 271 condition were identified using linear discriminant analysis effect size (LEfSe). An LDA >  
 272 2.0 and p < 0.05 was considered significant. AAD: patients with non-*C. difficile* antibiotic-  
 273 associated diarrhea. CDI: patients with confirmed *C. difficile* infection. D1: rectal swab

274 sample collected upon study enrollment. LDA: Linear discriminant analysis score. OTU:  
275 Operational taxonomic unit.



276 Supplementary Table 6: **BLAST results of sequences identified through oligotyping**

| OTU    | LEfSe                      | Oligotype      | Genus                    | Species                     | NCBI blast % identity | Distribution between oligotypes (%) |
|--------|----------------------------|----------------|--------------------------|-----------------------------|-----------------------|-------------------------------------|
| OTU1   | <i>Enterococcus</i>        | 1              | <i>Enterococcus</i>      | <i>hirae</i>                | 100.00                | 68.01                               |
|        |                            |                | <i>Enterococcus</i>      | <i>villorum</i>             |                       |                                     |
|        |                            |                | <i>Enterococcus</i>      | <i>ratti</i>                |                       |                                     |
|        |                            |                | <i>Enterococcus</i>      | <i>faecium</i>              |                       |                                     |
|        |                            |                | <i>Enterococcus</i>      | <i>durans</i>               |                       |                                     |
|        |                            | 2              | <i>Enterococcus</i>      | <i>faecalis</i>             | 100.00                | 31.89                               |
| OTU9   | <i>Finegoldia</i>          | 1              | <i>Finegoldia</i>        | <i>magna</i>                | 100.00                | 98.54                               |
| OTU30  | <i>Blautia</i>             | 1              | <i>Blautia</i>           | <i>wexlerae</i>             | 100.00                | 57.84                               |
|        |                            | 2              | <i>Blautia</i>           | <i>obeum</i>                | 99.75                 | 21.51                               |
|        |                            | 3              | <i>Blautia</i>           | <i>faecis</i>               | 100.00                | 20.42                               |
| OTU31  | <i>Ruminococcus2</i>       | 1              | <i>Ruminococcus</i>      | <i>torques</i>              | 99.50                 | 61.32                               |
|        |                            | 2              | <i>Ruminococcus</i>      | <i>faecis</i>               | 100.00                | 25.39                               |
|        |                            | 3              | <i>Clostridium</i>       | <i>glycyrrhizinilyticum</i> | 99.26                 | 4.48                                |
|        |                            | 4              | <i>Ruminococcus</i>      | <i>lactaris</i>             | 99.75                 | 8.34                                |
| OTU56  | <i>Porphyromonas</i>       | 1              | <i>Porphyromonas</i>     | <i>bennonis</i>             | 99.53                 | 40.54                               |
| OTU64  | <i>Ezakiella</i>           | 1              | <i>Bacteroides</i>       | <i>coagulans</i>            | 100.00                | 98.28                               |
| OTU68  | <i>Alistipes</i>           | 1              | <i>Alistipes</i>         | <i>onderdonkii</i>          | 100.00                | 49.26                               |
|        |                            | 2              | <i>Alistipes</i>         | <i>finegoldii</i>           | 100.00                | 31.58                               |
|        |                            | 3              | <i>Alistipes</i>         | <i>timonensis</i>           | 97.87                 | 12.60                               |
|        |                            |                | <i>Alistipes</i>         | <i>onderdonkii</i>          |                       |                                     |
| OTU69  | <i>Porphyromonas</i>       | 1              | <i>Porphyromonas</i>     | <i>asaccharolytica</i>      | 100.00                | 34.26                               |
|        |                            | 2              | <i>Porphyromonas</i>     | <i>uenonis</i>              | 99.53                 | 28.37                               |
| OTU280 | <i>Bifidobacterium</i>     | 1              | <i>Bifidobacterium</i>   | <i>adolescentis</i>         | 100.00                | 40.91                               |
|        |                            |                | <i>Bifidobacterium</i>   | <i>faecale</i>              |                       |                                     |
|        |                            |                | <i>Bifidobacterium</i>   | <i>stercoris</i>            |                       |                                     |
|        |                            | 2              | <i>Bifidobacterium</i>   | <i>pseudocatenulatum</i>    | 100.00                | 28.28                               |
|        |                            |                | <i>Bifidobacterium</i>   | <i>kashiwanohense</i>       |                       |                                     |
|        |                            |                | <i>Bifidobacterium</i>   | <i>catenulatum</i>          |                       |                                     |
| 3      | <i>Bifidobacterium</i>     | <i>dentium</i> | 99.76                    | 30.22                       |                       |                                     |
| OTU648 | <i>Blautia</i>             | 1              | <i>Blautia</i>           | <i>luti</i>                 | 99.75                 | 92.07                               |
| OTU106 | Uncultured Clostridiales   | 1*             | <i>Casaltella</i>        | <i>massiliensis</i>         | 98.76–99.75           | 100.00                              |
| OTU137 | Uncultured Lachnospiraceae | 1              | <i>Eubacterium</i>       | <i>hallii</i>               | 99.00                 | 61.00                               |
|        |                            | 2              | <i>Eubacterium</i>       | <i>hallii</i>               | 99.00                 | 35.24                               |
| OTU262 | <i>Butyricoccus</i>        | 1              | <i>Agathobaculum</i>     | <i>butyriciproducens</i>    | 99.75                 | 51.64                               |
|        |                            | 2              | <i>Intestinibacillus</i> | <i>massiliensis</i>         | 98.01                 | 17.78                               |
|        |                            | 3              | <i>Agathobaculum</i>     | <i>desmolans</i>            | 98.01                 | 6.87                                |

|         |                               |    |                          |                          |                 |        |
|---------|-------------------------------|----|--------------------------|--------------------------|-----------------|--------|
|         |                               |    | <i>Intestinibacillus</i> | <i>massiliensis</i>      |                 |        |
|         |                               | 4  | <i>Butyricoccus</i>      | <i>faecihominis</i>      | 99.75           | 1.94   |
|         |                               |    | <i>Agathobaculum</i>     | <i>butyriciproducens</i> |                 |        |
| OTU294  | Uncultured<br>Lachnospiraceae | 1  | <i>Eubacterium</i>       | <i>eligens</i>           | 94.78           | 96.29  |
| OTU300  | <i>Odoribacter</i>            | 1  | <i>Odoribacter</i>       | <i>splanchnicus</i>      | 99.52           | 54.64  |
|         |                               | 2  | <i>Odoribacter</i>       | <i>splanchnicus</i>      | 100.00          | 42.51  |
| OTU399  | Uncultured<br>Ruminococcaceae | 1* | No valid hits            |                          |                 | 100.00 |
| OTU794  | <i>Roseburia</i>              | 1  | <i>Roseburia</i>         | <i>inulinivorans</i>     | 100.00          | 95.49  |
| OTU2540 | <i>Ruminococcus</i>           | 1* | <i>Ruminococcus</i>      | <i>bromii</i>            | 99.01–<br>99.50 | 100.00 |
| OTU2858 | Uncultured<br>Lachnospiraceae | 1  | <i>Dorea</i>             | <i>formicigenerans</i>   | 99.00           | 94.78  |
|         |                               | 2  | <i>Lactonifactor</i>     | <i>longoviformis</i>     | 99.50           | 4.61   |

277 Sequences identified via oligotyping clustered within differentially abundant OTUs as  
278 identified by LEfSe with an average relative abundance > 0.1% were classified using NCBI  
279 blastn and the 16S rRNA database as reference where hits with an identity > 97% were  
280 reported. \*: Several oligotypes detected within the OTU with the same classification. LEfSe:  
281 Linear discriminant analysis effect size. OTU: Operational taxonomic unit.

282 Supplementary Table 7: **Relative abundances within oligotypes defined by shotgun metagenomics**

| Species                                 | OTU    | Oligotype | Relative abundance within oligotype by shotgun metagenomics |         |         |         |         |         |         |         |         |         | Relative abundance of oligotype by 16S gene profiling |         |         |         |         |         |         |         |         |         |         |         |         |         |         |         |         |
|-----------------------------------------|--------|-----------|-------------------------------------------------------------|---------|---------|---------|---------|---------|---------|---------|---------|---------|-------------------------------------------------------|---------|---------|---------|---------|---------|---------|---------|---------|---------|---------|---------|---------|---------|---------|---------|---------|
|                                         |        |           | P0022D1                                                     | P0085D1 | P0254D1 | P0380D1 | P0603D1 | P0643D1 | P0715D1 | P0745D1 | P0754D1 | P0022D1 | P0085D1                                               | P0254D1 | P0380D1 | P0603D1 | P0643D1 | P0715D1 | P0745D1 | P0754D1 | P0022D1 | P0085D1 | P0254D1 | P0380D1 | P0603D1 | P0643D1 | P0715D1 | P0745D1 | P0754D1 |
| <i>Enterococcus durans</i>              |        |           | 5.56                                                        | 13.77   | 0.14    | 0.15    | 3.15    | 0.00    | 51.58   | 1.02    | 14.77   |         |                                                       |         |         |         |         |         |         |         |         |         |         |         |         |         |         |         |         |
| <i>Enterococcus faecium</i>             |        |           | 1.39                                                        | 40.58   | 98.97   | 97.47   | 94.16   | 3.39    | 13.12   | 93.62   | 68.18   |         |                                                       |         |         |         |         |         |         |         |         |         |         |         |         |         |         |         |         |
| <i>Enterococcus hirae</i>               |        | Otu1      | 0.00                                                        | 8.51    | 0.02    | 0.00    | 0.09    | 0.00    | 0.00    | 1.88    | 0.00    | 0.89    | 9.58                                                  | 99.79   | 86.04   | 99.43   | 28.57   | 60.88   | 87.62   | 90.72   | 2.72    | 51.39   | 100     | 86.49   | 99.42   | 64.85   | 0.00    | 98.03   | 100     |
| <i>Enterococcus ratti</i>               |        |           | 0.00                                                        | 0.00    | 0.00    | 0.00    | 0.00    | 0.00    | 0.00    | 0.00    | 0.00    |         |                                                       |         |         |         |         |         |         |         |         |         |         |         |         |         |         |         |         |
| <i>Enterococcus villorum</i>            |        |           | 93.06                                                       | 37.14   | 0.87    | 2.38    | 2.60    | 96.61   | 35.29   | 3.48    | 17.05   |         |                                                       |         |         |         |         |         |         |         |         |         |         |         |         |         |         |         |         |
| <i>Enterococcus faecalis</i>            |        | 2         | 100.00                                                      | 100     | 100     | 100     | 100     | 100     | 100     | 100     | 100     | 99.11   | 90.42                                                 | 0.21    | 13.96   | 0.57    | 71.43   | 39.12   | 12.38   | 9.28    | 97.28   | 48.61   | 0.00    | 13.51   | 0.58    | 35.15   | 100     | 1.97    | 0.00    |
| <i>Fingoldia magna</i>                  | Otu9   | 1         | 100.00                                                      | 100     | -       | -       | 100     | 100     | 100     | 100     | 100     | 100     | 100                                                   | -       | -       | 100     | 100     | 100     | 100     | 100     | 99.32   | 100     | 100     | -       | 100     | 100     | -       | -       | -       |
| <i>Blautia wexlerae</i>                 |        | 1         | 100.00                                                      | 100     | 100     | 100     | 100     | 100     | 100     | 100     | 100     | 65.17   | 100                                                   | 33.88   | 64.71   | 14.04   | 86.89   | 96.43   | 67.92   | 79.12   | 99.32   | 100     | 100     | -       | 100     | 100     | -       | -       | -       |
| <i>Blautia obeum</i>                    | Otu30  | 2         | 100.00                                                      | -       | 100     | 100     | 100     | -       | 100     | 100     | 100     | 29.53   | 0.00                                                  | 61.16   | 17.65   | 70.18   | 0.00    | 0.72    | 9.43    | 1.05    | 25.87   | 0.00    | -       | -       | 50.00   | 0.00    | 0.00    | 12.50   | 8.28    |
| <i>Blautia faecis</i>                   |        | 3         | 100.00                                                      | -       | 100     | 100     | 100     | 100     | 100     | 100     | 100     | 5.30    | 0.00                                                  | 4.96    | 17.65   | 15.79   | 13.11   | 2.85    | 22.64   | 19.83   | 4.89    | 0.00    | -       | -       | 20.83   | 0.00    | 0.51    | 0.00    | 16.91   |
| [ <i>Ruminococcus</i> ] <i>torques</i>  |        | 1         | 100.00                                                      | 100     | -       | 100     | 100     | -       | 100     | 100     | 100     | 1.56    | 100                                                   | 0.00    | 99.68   | 90.00   | 0.00    | 99.64   | 22.22   | 40.12   | 69.10   | 100     | -       | -       | 29.17   | 100     | 99.49   | 87.50   | 74.73   |
| [ <i>Ruminococcus</i> ] <i>faecis</i>   | Otu31  | 2         | 100.00                                                      | -       | 100     | 100     | 100     | -       | 100     | 100     | 100     | 3.15    | 0.00                                                  | 75.00   | 0.32    | 6.67    | 0.00    | 0.13    | 77.78   | 58.88   | 25.87   | 0.00    | -       | -       | 50.00   | 0.00    | 0.00    | 12.50   | 8.28    |
| [ <i>Ruminococcus</i> ] <i>lactaris</i> |        | 4         | 100.00                                                      | -       | 100     | -       | 100     | 100     | 100     | -       | 100     | 95.29   | 0.00                                                  | 25.00   | 0.00    | 3.33    | 100     | 0.22    | 0.00    | 0.99    | 4.89    | 0.00    | -       | -       | 20.83   | 0.00    | 0.51    | 0.00    | 16.91   |
| <i>Porphyromonas bennonis</i>           | Otu56  | 1         | 100.00                                                      | -       | 100     | -       | 100     | -       | 100     | 100     | 100     | 100     | -                                                     | 100     | -       | 100     | -       | 100     | 100     | 100     | -       | -       | -       | 0.00    | 0.00    | -       | 0.00    | 0.00    | 100     |
| <i>Alistipes onderdonkii</i>            |        | 1         | 100.00                                                      | 100     | 100     | 100     | 100     | 100     | 100     | -       | 100     | 86.27   | 98.00                                                 | 68.72   | 31.31   | 71.00   | 16.46   | 3.41    | 0.00    | 26.46   | 85.44   | -       | 100     | 100     | 94.35   | -       | -       | -       | 16.32   |
| <i>Alistipes finegoldii</i>             | Otu68  | 2         | 100.00                                                      | 100     | 100     | 100     | 100     | 100     | 100     | 100     | 100     | 13.33   | 2.00                                                  | 31.28   | 67.86   | 28.76   | 82.46   | 88.07   | 100     | 73.33   | 2.72    | -       | 0.00    | 0.00    | 4.52    | -       | -       | -       | 10.88   |
| <i>Alistipes timonensis</i>             |        | 3         | 100.00                                                      | -       | -       | 100     | 100     | 100     | 100     | -       | 100     | 0.40    | 0.00                                                  | 0.00    | 0.83    | 0.24    | 1.08    | 8.52    | 0.00    | 0.21    | 11.83   | -       | 0.00    | 0.00    | 1.13    | -       | -       | -       | 72.80   |
| <i>Porphyromonas asaccharolytica</i>    | Otu69  | 1         | 100.00                                                      | -       | 100     | -       | 100     | -       | 100     | 100     | 100     | 0.76    | -                                                     | 0.04    | 0.00    | 9.17    | 0.00    | 14.94   | 58.54   | 2.64    | -       | -       | -       | -       | 0.00    | 0.00    | 0.00    | -       | 0.00    |
| <i>Porphyromonas uenonis</i>            |        | 2         | 100.00                                                      | -       | 100     | 100     | 100     | 100     | 100     | 100     | 100     | 99.24   | -                                                     | 99.96   | 100     | 90.83   | 100     | 85.06   | 41.46   | 97.36   | -       | -       | -       | -       | 99.59   | 100     | 0.00    | -       | 100     |
| <i>Anaerobutyricum hallii</i>           | Otu137 | 1         | 100.00                                                      | -       | -       | -       | 100     | 100     | 100     | 100     | 100     | 100     | -                                                     | -       | -       | 100     | 100     | 100     | 100     | 100     | 100     | -       | -       | -       | 0.00    | -       | -       | 0.00    | 95.77   |
| <i>Agathobaculum butyriciproducens</i>  | Otu262 | 1         | 100.00                                                      | -       | 100     | 100     | 100     | 100     | 100     | 100     | 100     | 25.05   | 0.00                                                  | 0.09    | 0.82    | 0.10    | 0.65    | 2.07    | 7.41    | 4.62    | 91.98   | -       | -       | 100     | -       | -       | 86.05   | 100     | -       |
| <i>Intestinibacillus massiliensis</i>   |        | 2         | 100.00                                                      | 100     | 100     | 100     | 100     | 100     | 100     | 100     | 100     | 5.12    | 100                                                   | 0.10    | 1.84    | 0.25    | 0.92    | 8.78    | 14.81   | 12.51   | 8.02    | -       | -       | 0.00    | -       | -       | 13.95   | 0.00    | -       |

|                                          |         |   |        |     |     |     |       |     |      |     |       |       |      |       |       |       |       |        |       |       |       |      |   |      |      |     |      |       |      |
|------------------------------------------|---------|---|--------|-----|-----|-----|-------|-----|------|-----|-------|-------|------|-------|-------|-------|-------|--------|-------|-------|-------|------|---|------|------|-----|------|-------|------|
| <i>Agathobaculum desmolans</i>           |         | 3 | 100.00 | -   | 100 | 100 | 100   | 100 | 100  | 100 | 100   | 69.83 | 0.00 | 99.81 | 97.34 | 99.66 | 98.43 | 89.15  | 77.78 | 82.87 | 0.00  | -    | - | 0.00 | -    | -   | 0.00 | 0.00  | -    |
| <i>Bifidobacterium adolescentis</i>      |         | 1 | 100.00 | 100 | -   | -   | -     | 100 | 100  | 100 | 100   | 43.25 | 100  | -     | -     | 0.00  | 100   | 97.53  | 96.71 | 3.70  | 100   | -    | - | -    | 0.00 | -   | 100  | 8.11  | -    |
| <i>Bifidobacterium catenulatum</i>       | Otu280  | 2 | 90.78  | -   | -   | -   | 20.00 | -   | 100  | -   | 97.22 | 55.95 | 0.00 | -     | -     | 83.33 | 0.00  | 0.99   | 0.00  | 95.24 | 0.00  | -    | - | -    | 100  | -   | 0.00 | 10.81 | -    |
| <i>Bifidobacterium pseudocatenulatum</i> |         |   | 9.22   | -   | -   | -   | 80.00 | -   | 0.00 | -   | 2.78  |       |      |       |       |       |       |        |       |       |       |      |   |      |      |     |      |       |      |
| <i>Bifidobacterium dentium</i>           |         | 3 | 100.00 | -   | -   | -   | 100   | -   | 100  | 100 | 100   | 0.79  | 0.00 | -     | -     | 16.67 | 0.00  | 1.48   | 3.29  | 1.06  | 0.00  | -    | - | -    | 0.00 | -   | 0.00 | 81.08 | -    |
| <i>Lachnospira eligens</i>               | Otu294  | 1 | 100.00 | -   | 100 | -   | 100   | -   | 100  | 100 | 100   | 100   | -    | 100   | -     | 100   | -     | 100    | 100   | 100   | 100   | -    | - | -    | -    | 100 | -    | -     | 100  |
| <i>Odoribacter splanchnicus</i>          | Otu300  | 1 | 100.00 | -   | 100 | 100 | 100   | 100 | 100  | -   | 100   | 100   | -    | 100   | 100   | 100   | 100   | -      | 100   | 100   | 0.00  | -    | - | -    | 100  | 100 | 0.00 | -     | 8.49 |
| <i>Blautia luti</i>                      | Otu648  | 1 | 100.00 | -   | 100 | 100 | 100   | 100 | 100  | 100 | 100   | 100   | -    | 100   | 100   | 100   | 100   | 100    | 100   | 100   | 99.55 | -    | - | -    | 100  | -   | -    | 100   | 100  |
| <i>Roseburia inulinivorans</i>           | Otu794  | 1 | 100.00 | 100 | 100 | 100 | 100   | 100 | 100  | 100 | 100   | 100   | 100  | 100   | 100   | 100   | 100   | 100    | 100   | 100   | -     | -    | - | -    | -    | -   | -    | -     | -    |
| <i>Ruminococcus bromii</i>               | Otu2540 | 1 | 100.00 | 100 | -   | -   | -     | -   | 100  | -   | 100   | 100   | 100  | -     | -     | -     | -     | 100.00 | -     | 100   | -     | -    | - | -    | -    | -   | -    | -     | -    |
| <i>Dorea formicigenerans</i>             | Otu2858 | 1 | 100.00 | 100 | 100 | 100 | 100   | 100 | 100  | 100 | 100   | 80.06 | 100  | 13.49 | 1.08  | 47.15 | 8.96  | 14.87  | 66.67 | 89.71 | 100   | 100  | - | -    | -    | -   | -    | 100   | 100  |
| <i>Lactonifactor longoviformis</i>       |         | 2 | 100.00 | -   | 100 | 100 | 100   | 100 | 100  | 100 | 100   | 19.94 | 0.00 | 86.51 | 98.92 | 52.85 | 91.04 | 85.13  | 33.33 | 10.29 | 0.00  | 0.00 | - | -    | -    | -   | -    | 0.00  | 0.00 |

283 Overview of abundances of individual species within oligotypes defined by shotgun metagenomics, the total relative abundances of oligotypes  
284 identified by shotgun metagenomics, and the relative abundances of oligotypes defined by 16S rRNA gene profiling in D1 samples collected  
285 from patients developing CDI (n = 9). CDI: patients with confirmed *C. difficile* infection. D1: rectal swab sample collected upon study  
286 enrollment. OTU: Operational taxonomic unit.

287 Supplementary Table 8: **Oligotyping of OTUs of interest in the validation dataset**

| OTU    | OTU classification         | Oligotype           | Genus                     | Species                 | Distribution between oligotypes (%) |
|--------|----------------------------|---------------------|---------------------------|-------------------------|-------------------------------------|
| Otu1   | <i>Enterococcus</i>        | 1                   | <i>Enterococcus</i>       | <i>faecalis</i>         | 73.81                               |
|        |                            | 2                   | <i>Enterococcus</i>       | <i>hirae</i>            | 26.19                               |
|        |                            |                     |                           | <i>villorum</i>         |                                     |
|        |                            |                     |                           | <i>ratti</i>            |                                     |
|        |                            |                     |                           | <i>faecium</i>          |                                     |
|        |                            |                     |                           | <i>durans</i>           |                                     |
| Otu6   | <i>Faecalibacterium</i>    | 1                   | <i>Faecalibacterium</i>   | <i>pausnitzii</i>       | 100.00                              |
| Otu9   | <i>Finegoldia</i>          | 1                   | <i>Finegoldia</i>         | <i>magna</i>            | 100.14                              |
| Otu11  | Uncultured Ruminococcaceae | 1                   | <i>Ruthenibacterium</i>   | <i>lactatiformans</i>   | 100.00                              |
| Otu12  | <i>Clostridiux XI</i>      | 1                   | <i>Clostridioides</i>     | <i>difficile</i>        | 68.29                               |
|        |                            | 2                   | <i>Intestinibacter</i>    | <i>bartlettii</i>       | 31.71                               |
| Otu14  | <i>Prevotella</i>          | 1                   | <i>Prevotella</i>         | <i>bivia</i>            | 100.00                              |
| Otu16  | <i>Bacteroides</i>         | 1                   | <i>Bacteroides</i>        | <i>thetaiotaomicron</i> | 77.04                               |
|        |                            | 2                   | <i>Bacteroides</i>        | <i>finegoldii</i>       | 20.74                               |
|        |                            | 3                   | <i>Bacteroides</i>        | <i>xylanisolvans</i>    | 2.22                                |
| Otu26  | <i>Akkermansia</i>         | 1                   | <i>Akkermansia</i>        | <i>municiphila</i>      | 100.00                              |
| Otu28  | <i>Peptostreptococcus</i>  | 1                   | <i>Peptostreptococcus</i> | <i>anaerobius</i>       | 86.32                               |
|        |                            | 2                   | <i>Peptostreptococcus</i> | <i>stomatis</i>         | 13.68                               |
| Otu31  | <i>Ruminococcus2</i>       | 1                   | <i>Ruminococcus</i>       | <i>torques</i>          | 100.00                              |
| Otu37  | Uncultured Clostridiales   | 1                   | <i>Fenollaria</i>         | <i>massilensis</i>      | 100.00                              |
| Otu63  | <i>Bacteroides</i>         | 1                   | <i>Bacteroides</i>        | <i>uniformis</i>        | 100.00                              |
| Otu64  | <i>Ezakiella</i>           | 1                   | <i>Bacteroides</i>        | <i>coagulans</i>        | 100.00                              |
| Otu75  | <i>Anaerococcus</i>        | 1                   | <i>Anaerococcus</i>       | <i>vaginalis</i>        | 97.24                               |
|        |                            | 2                   | <i>Anaerococcus</i>       | <i>obesiensis</i>       | 2.67                                |
|        |                            | 3                   | <i>Anaerococcus</i>       | <i>senegalensis</i>     | 0.10                                |
| Otu79  | <i>Anaerococcus</i>        | 1                   | <i>Anaerococcus</i>       | <i>mediterraneensis</i> | 42.22                               |
|        |                            |                     |                           | <i>murdochii</i>        |                                     |
|        |                            | 2                   | <i>Anaerococcus</i>       | <i>prevotii</i>         | 36.79                               |
|        |                            |                     |                           | <i>tetradus</i>         |                                     |
| 3      | <i>Anaerococcus</i>        | <i>lactolyticus</i> | 15.56                     |                         |                                     |
|        |                            |                     | <i>mediterraneensis</i>   |                         |                                     |
|        |                            | 4                   | <i>Anaerococcus</i>       | <i>prevotii</i>         | 5.43                                |
|        |                            |                     |                           | <i>murdochii</i>        |                                     |
|        |                            |                     |                           | <i>tetradus</i>         |                                     |
| Otu84  | <i>Peptoniphilus</i>       | 1                   | <i>Peptoniphilus</i>      | <i>lacrimalis</i>       | 100.00                              |
| Otu102 | <i>Ruminococcus</i>        | 1                   | <i>Ruminococcus</i>       | <i>bromii</i>           | 100.00                              |
| Otu105 | <i>Peptoniphilus</i>       | 1                   | <i>Peptoniphilus</i>      | <i>grossensis</i>       | 47.49                               |
|        |                            | 2                   | <i>Peptoniphilus</i>      | <i>lacydonensis</i>     | 46.21                               |

|        |                            |   |                        | <i>gorbachii</i>                  |        |
|--------|----------------------------|---|------------------------|-----------------------------------|--------|
|        |                            | 3 | <i>Peptoniphilus</i>   | <i>harei</i>                      | 6.13   |
|        |                            | 4 | <i>Peptoniphilus</i>   | <i>tyrrelliae</i>                 | 0.18   |
| Otu106 | Uncultured Clostridiales   | 1 | <i>Casaltella</i>      | <i>massilensis</i>                | 100.00 |
| Otu120 | <i>Bacteroides</i>         | 1 | <i>Bacteroides</i>     | <i>stercoris</i>                  | 100.00 |
| Otu126 | <i>Parabacteroides</i>     | 1 | <i>Parabacteroides</i> | <i>merdae</i>                     | 100.00 |
|        |                            | 1 | <i>Bacteroides</i>     | <i>finegoldii</i>                 | 37.12  |
|        |                            | 2 | <i>Bacteroides</i>     | <i>xylanisolvans</i>              | 35.23  |
| Otu158 | <i>Bacteroides</i>         | 3 | <i>Bacteroides</i>     | <i>kribbi</i><br><i>koreensis</i> | 15.15  |
|        |                            | 4 | <i>Bacteroides</i>     | <i>ovatus</i>                     | 12.50  |
| Otu163 | <i>Dorea</i>               | 1 | <i>Dorea</i>           | <i>longicatena</i>                | 100.00 |
| Otu207 | <i>Barnesiella</i>         | 1 | <i>Barnesiella</i>     | <i>intestinihominis</i>           | 100.00 |
| Otu252 | Uncultured Ruminococcaceae | 1 | <i>Gemmiger</i>        | <i>formicilis</i>                 | 100.00 |
| Otu254 | <i>Lachnospira</i>         | 1 | <i>Eubacterium</i>     | <i>eligens</i>                    | 100.00 |
| Otu300 | <i>Odoribacter</i>         | 1 | <i>Odoribacter</i>     | <i>splanchnicus</i>               | 100.00 |

288 Oligotyping was performed on OTUs of interest in an independent validation cohort<sup>15</sup> to  
289 delineate their correlation with the taxa of interest in the main study. Biomarkers associated  
290 with CDI and non-CDI patients were identified by utilizing LEfSe (LDA > 2.0). CDI: patients  
291 with confirmed *C. difficile* infection. Non-CDI: patients with non-*C. difficile* diarrhea or non-  
292 diarrheic patients. LDA: Linear discriminant analysis score. LEfSe: Linear discriminant  
293 analysis effect size. OTU: Operational taxonomic unit.

294 Supplementary Table 9: **Validation of identified microbiota-based markers predictive of**  
 295 **CDI in an independent patient cohort**

| OTU     | OTU classification         | ANTICIPATE dataset |                                |      |         | Validation dataset |                                |      |         |
|---------|----------------------------|--------------------|--------------------------------|------|---------|--------------------|--------------------------------|------|---------|
|         |                            | Patient group      | Average relative abundance (%) | LDA  | p-value | Patient group      | Average relative abundance (%) | LDA  | p-value |
| Otu1    | <i>Enterococcus</i>        | CDI                | 1.86                           | 4.27 | 0.0001  | CDI                | 6.02                           | 4.41 | 0.0037  |
| Otu9    | <i>Finegoldia</i>          | CDI                | 4.18                           | 4.32 | 0.0200  | Non-CDI            | 2.82                           | 3.95 | 0.0009  |
| Otu11   | Uncultured Ruminococcaceae | -                  | 0.23                           | -    | -       | CDI                | 1.98                           | 3.97 | 0.0190  |
| Otu12   | <i>Clostridium XI</i>      | -                  | 0.25                           | -    | -       | CDI                | 1.11                           | 3.95 | 0.0065  |
| Otu17   | <i>Corynebacterium</i>     | -                  | 0.42                           | -    | -       | CDI                | 0.25                           | 3.55 | 0.0026  |
| Otu6    | <i>Faecalibacterium</i>    | -                  | 2.07                           | -    | -       | CDI                | 1.73                           | 3.63 | 0.0137  |
| Otu30   | <i>Blautia</i>             | Non-CDI            | 2.28                           | 3.83 | 0.0076  | -                  | 0.21                           | -    | -       |
| Otu31   | <i>Ruminococcus2</i>       | Non-CDI            | 1.32                           | 3.53 | 0.0059  | Non-CDI            | 2.09                           | 3.70 | 0.0302  |
| Otu56   | <i>Porphyromonas</i>       | Non-CDI            | 1.29                           | 3.77 | 0.0253  | -                  | 0.00                           | -    | -       |
| Otu69   | <i>Porphyromonas</i>       | Non-CDI            | 0.86                           | 3.63 | 0.0164  | -                  | 0.00                           | -    | -       |
| Otu68   | <i>Alistipes</i>           | Non-CDI            | 0.78                           | 3.35 | 0.0379  | -                  | 0.97                           | -    | -       |
| Otu64   | <i>Ezakiella</i>           | Non-CDI            | 0.77                           | 3.59 | 0.0320  | Non-CDI            | 1.20                           | 3.79 | 0.0190  |
| Otu280  | <i>Bifidobacterium</i>     | Non-CDI            | 0.73                           | 3.53 | 0.0411  | -                  | 1.02                           | -    | -       |
| Otu2540 | <i>Ruminococcus</i>        | Non-CDI            | 0.65                           | 3.40 | 0.0263  | -                  | 0.05                           | -    | -       |
| Otu648  | <i>Blautia</i>             | Non-CDI            | 0.54                           | 3.29 | 0.0156  | -                  | 0.79                           | -    | -       |
| Otu137  | Uncultured Lachnospiraceae | Non-CDI            | 0.42                           | 3.14 | 0.0487  | -                  | 0.06                           | -    | -       |
| Otu106  | Uncultured Clostridiales   | Non-CDI            | 0.34                           | 3.18 | 0.0117  | Non-CDI            | 1.11                           | 4.06 | 0.0006  |
| Otu974  | <i>Roseburia</i>           | Non-CDI            | 0.23                           | 3.02 | 0.0032  | -                  | 0.23                           | -    | -       |
| Otu300  | <i>Odoribacter</i>         | Non-CDI            | 0.20                           | 2.79 | 0.0496  | Non-CDI            | 0.40                           | 3.64 | 0.0022  |
| Otu2858 | Uncultured Lachnospiraceae | Non-CDI            | 0.19                           | 2.85 | 0.0272  | -                  | 0.12                           | -    | -       |
| Otu399  | Uncultured Ruminococcaceae | Non-CDI            | 0.14                           | 2.86 | 0.0214  | -                  | 0.02                           | -    | -       |
| Otu294  | Uncultured Lachnospiraceae | Non-CDI            | 0.14                           | 2.79 | 0.0403  | -                  | 0.14                           | -    | -       |
| Otu262  | <i>Butyricoccus</i>        | Non-CDI            | 0.13                           | 2.84 | 0.0020  | -                  | 0.20                           | -    | -       |
| Otu1827 | Uncultured Lachnospiraceae | Non-CDI            | 0.08                           | 2.54 | 0.0037  | -                  | 0.00                           | -    | -       |
| Otu781  | Uncultured Clostridiales   | Non-CDI            | 0.03                           | 2.62 | 0.0003  | -                  | 0.00                           | -    | -       |
| Otu409  | <i>Flavonifractor</i>      | Non-CDI            | 0.03                           | 2.57 | 0.0492  | -                  | 0.00                           | -    | -       |
| Otu63   | <i>Bacteroides</i>         | -                  | 1.51                           | -    | -       | Non-CDI            | 3.26                           | 3.90 | 0.0087  |
| Otu37   | Uncultured Clostridiales   | -                  | 1.92                           | -    | -       | Non-CDI            | 2.55                           | 4.42 | 0.0001  |
| Otu75   | <i>Anaerococcus</i>        | -                  | 1.08                           | -    | -       | Non-CDI            | 1.95                           | 4.00 | 0.0002  |
| Otu105  | <i>Peptoniphilus</i>       | -                  | 1.74                           | -    | -       | Non-CDI            | 1.92                           | 4.05 | 0.0042  |
| Otu79   | <i>Anaerococcus</i>        | -                  | 0.79                           | -    | -       | Non-CDI            | 1.85                           | 4.02 | 0.0376  |
| Otu14   | <i>Prevotella</i>          | -                  | 1.06                           | -    | -       | Non-CDI            | 1.82                           | 4.16 | 0.0240  |
| Otu126  | <i>Parabacteroides</i>     | -                  | 0.43                           | -    | -       | Non-CDI            | 1.79                           | 4.23 | 0.0000  |

|        |                            |   |      |   |   |         |      |      |        |
|--------|----------------------------|---|------|---|---|---------|------|------|--------|
| Otu158 | <i>Bacteroides</i>         | - | 0.61 | - | - | Non-CDI | 1.15 | 3.72 | 0.0047 |
| Otu28  | <i>Peptostreptococcus</i>  | - | 0.62 | - | - | Non-CDI | 1.07 | 3.74 | 0.0277 |
| Otu26  | <i>Akkermansia</i>         | - | 1.66 | - | - | Non-CDI | 1.06 | 3.77 | 0.0118 |
| Otu252 | Uncultured Ruminococcaceae | - | 0.38 | - | - | Non-CDI | 0.88 | 3.76 | 0.0169 |
| Otu84  | <i>Peptoniphilus</i>       | - | 0.51 | - | - | Non-CDI | 0.72 | 3.70 | 0.0081 |
| Otu254 | <i>Lachnospira</i>         | - | 0.28 | - | - | Non-CDI | 0.67 | 3.75 | 0.0019 |
| Otu16  | <i>Bacteroides</i>         | - | 0.72 | - | - | Non-CDI | 0.57 | 3.65 | 0.0012 |
| Otu163 | <i>Dorea</i>               | - | 0.41 | - | - | Non-CDI | 0.52 | 3.47 | 0.0080 |
| Otu102 | <i>Ruminococcus</i>        | - | 0.26 | - | - | Non-CDI | 0.52 | 3.53 | 0.0022 |
| Otu120 | <i>Bacteroides</i>         | - | 0.22 | - | - | Non-CDI | 0.49 | 3.71 | 0.0033 |
| Otu207 | <i>Barnesiella</i>         | - | 0.28 | - | - | Non-CDI | 0.28 | 3.55 | 0.0298 |

296 Microbiota-based biomarkers identified in the main study were validated by conducting  
297 biomarker identification in an independent validation cohort<sup>15</sup>. Potential biomarkers  
298 associated with CDI (n = 24) and non-CDI (n = 25) patients were identified in the validation  
299 cohort by utilizing LefSe (LDA > 2.0). OTU9 classified as *Finegoldia* was associated with  
300 patients developing CDI (n = 14) when comparing with non-CDI patients (n = 733) in the  
301 main study. The non-CDI group in the main study contain patients developing AAD as well  
302 as non-diarrheic patients, and further investigation (Supplementary Tables 3 and 5) revealed  
303 this OTU to be strongly associated with patients developing AAD at D1. AAD: patients with  
304 non-*C. difficile* antibiotic-associated diarrhea. CDI: patients with confirmed *C. difficile*  
305 infection. ND: non-diarrheic patients. Non-CDI: patients with non-*C. difficile* diarrhea or non-  
306 diarrheic patients. D1: rectal swab sample collected upon study enrollment. LDA: Linear  
307 discriminant analysis score. LefSe: Linear discriminant analysis effect size. OTU:  
308 Operational taxonomic unit.



309 Supplementary Table 10: **Characterization of class-specific longitudinal alterations in**  
 310 **microbial composition as a result of broad-spectrum antibiotic treatment**

| Antibiotic class | Timepoint | OTU     | LDA                        | p-value                        | Genus                       |
|------------------|-----------|---------|----------------------------|--------------------------------|-----------------------------|
| PBL              | D1        | Otu105  | 3.73                       | 0.000                          | <i>Peptoniphilus</i>        |
|                  |           | Otu37   | 3.69                       | 0.000                          | Uncultured Clostridiales    |
|                  |           | Otu94   | 3.65                       | 0.000                          | <i>Streptococcus</i>        |
|                  |           | Otu56   | 3.63                       | 0.000                          | <i>Porphyromonas</i>        |
|                  |           | Otu75   | 3.63                       | 0.000                          | <i>Anaerococcus</i>         |
|                  |           | Otu109  | 3.61                       | 0.000                          | <i>Peptoniphilus</i>        |
|                  |           | Otu69   | 3.47                       | 0.001                          | <i>Porphyromonas</i>        |
|                  |           | Otu79   | 3.42                       | 0.000                          | <i>Anaerococcus</i>         |
|                  |           | Otu62   | 3.35                       | 0.000                          | <i>Streptococcus</i>        |
|                  |           | Otu92   | 3.29                       | 0.001                          | <i>Dialister</i>            |
|                  |           | Otu64   | 3.23                       | 0.007                          | <i>Ezakiella</i>            |
|                  |           | Otu48   | 3.12                       | 0.002                          | <i>Prevotella</i>           |
|                  | Otu106    | 3.12    | 0.000                      | Uncultured Clostridiales       |                             |
|                  | Otu108    | 3.06    | 0.000                      | <i>Campylobacter</i>           |                             |
|                  | D6        | Otu1    | 4.40                       | 0.000                          | <i>Enterococcus</i>         |
|                  |           | Otu5    | 4.10                       | 0.000                          | <i>Sphingomonas</i>         |
|                  |           | Otu6    | 3.96                       | 0.023                          | <i>Faecalibacterium</i>     |
|                  |           | Otu1392 | 3.74                       | 0.000                          | <i>Clostridium XIIVa</i>    |
| Otu61            |           | 3.49    | 0.027                      | <i>Parabacteroides</i>         |                             |
| Otu1403          |           | 3.05    | 0.000                      | <i>Clostridium XIIVa</i>       |                             |
| OBL              | D1        | Otu2    | 4.06                       | 0.010                          | <i>Escherichia/Shigella</i> |
|                  |           | Otu30   | 3.94                       | 0.000                          | <i>Blautia</i>              |
|                  |           | Otu8    | 3.70                       | 0.014                          | <i>Streptococcus</i>        |
|                  |           | Otu117  | 3.67                       | 0.000                          | <i>Roseburia</i>            |
|                  |           | Otu43   | 3.62                       | 0.000                          | <i>Collinsella</i>          |
|                  |           | Otu648  | 3.43                       | 0.038                          | <i>Blautia</i>              |
|                  |           | Otu2540 | 3.37                       | 0.023                          | <i>Ruminococcus</i>         |
|                  |           | Otu94   | 3.36                       | 0.000                          | <i>Streptococcus</i>        |
|                  |           | Otu974  | 3.31                       | 0.000                          | <i>Roseburia</i>            |
|                  |           | Otu3    | 3.18                       | 0.009                          | <i>Staphylococcus</i>       |
|                  |           | Otu163  | 3.17                       | 0.000                          | <i>Dorea</i>                |
|                  |           | Otu2858 | 3.13                       | 0.000                          | Uncultured Lachnospiraceae  |
|                  |           | Otu97   | 3.11                       | 0.000                          | <i>Anaerostipes</i>         |
|                  |           | Otu527  | 3.10                       | 0.000                          | <i>Coprococcus</i>          |
|                  |           | Otu78   | 3.06                       | 0.005                          | <i>Romboutsia</i>           |
| Otu137           | 3.05      | 0.000   | Uncultured Lachnospiraceae |                                |                             |
| D6               | Otu1      | 4.79    | 0.000                      | <i>Enterococcus</i>            |                             |
|                  | Otu167    | 3.32    | 0.000                      | Uncultured Erysipelotrichaceae |                             |

|     |    |         |      |       |                             |
|-----|----|---------|------|-------|-----------------------------|
|     |    | Otu1392 | 3.21 | 0.000 | <i>Clostridium XIIVa</i>    |
|     |    | Otu5    | 3.08 | 0.002 | <i>Sphingomonas</i>         |
|     |    | Otu37   | 3.99 | 0.031 | Uncultured Clostridiales    |
|     |    | Otu25   | 3.93 | 0.049 | <i>Campylobacter</i>        |
|     |    | Otu2    | 3.78 | 0.001 | <i>Escherichia/Shigella</i> |
|     |    | Otu105  | 3.68 | 0.000 | <i>Peptoniphilus</i>        |
|     |    | Otu79   | 3.61 | 0.000 | <i>Anaerococcus</i>         |
|     |    | Otu48   | 3.55 | 0.000 | <i>Prevotella</i>           |
|     |    | Otu56   | 3.41 | 0.001 | <i>Porphyromonas</i>        |
|     |    | Otu109  | 3.41 | 0.026 | <i>Peptoniphilus</i>        |
|     | D1 | Otu94   | 3.38 | 0.000 | <i>Streptococcus</i>        |
|     |    | Otu18   | 3.35 | 0.000 | <i>Prevotella</i>           |
|     |    | Otu69   | 3.35 | 0.004 | <i>Porphyromonas</i>        |
| FQN |    | Otu68   | 3.25 | 0.016 | <i>Alistipes</i>            |
|     |    | Otu280  | 3.24 | 0.012 | <i>Bifidobacterium</i>      |
|     |    | Otu110  | 3.20 | 0.000 | <i>Porphyromonas</i>        |
|     |    | Otu84   | 3.15 | 0.013 | <i>Peptoniphilus</i>        |
|     |    | Otu96   | 3.07 | 0.045 | <i>Alistipes</i>            |
|     |    | Otu300  | 3.02 | 0.000 | <i>Odoribacter</i>          |
|     |    | Otu5    | 4.03 | 0.019 | <i>Sphingomonas</i>         |
|     |    | Otu3    | 3.98 | 0.001 | <i>Staphylococcus</i>       |
|     | D6 | Otu10   | 3.94 | 0.023 | <i>Prevotella</i>           |
|     |    | Otu24   | 3.92 | 0.046 | <i>Prevotella</i>           |
|     |    | Otu63   | 3.83 | 0.016 | <i>Bacteroides</i>          |
|     |    | Otu92   | 3.14 | 0.039 | <i>Dialister</i>            |

311 The microbiota of patients treated with PBL (n = 194), OBL (n = 133), and FQN (n = 63) was  
312 compared at D1 and D6 to identify the class-specific impact of broad-spectrum antibiotic  
313 treatment. Distinctly abundant OTUs associated with each timepoint were identified using  
314 linear discriminant analysis effect size (LEfSe, LDA > 3.0). D1: rectal swab sample collected  
315 upon study enrolment. D6: rectal swab collected approximately six days after initiation and at  
316 the end of antibiotic treatment. PBL: penicillin + beta-lactamase inhibitor. OBL: other beta-  
317 lactamase antibiotics. FQN: fluoroquinolones. LDA: Linear discriminant analysis score.  
318 OTU: Operational taxonomic unit.

319 **Supplementary Table 11. Primers and overhang adapter sequences utilized in this study**

| Primer name                       | Sequence                                            |
|-----------------------------------|-----------------------------------------------------|
| 341F                              | 5'-CCT ACG GGN GGC WGC AG -3'                       |
| Illumina overhang forward<br>802R | 5'-TCG TCG GCA GCG TCA GAT GTG TAT AAG AGA CAG-3'   |
| Illumina overhang reverse         | 5'-GAC TAC HVG GGT ATC TAA TCC -3'                  |
|                                   | 5'-GTC TCG TGG GCT CGG AGA TGT GTA TAA GAG ACA G-3' |

320

321 Supplementary Table 12: **Reference genomes used for mapping of shotgun metagenomic**  
 322 **sequences to identify the most abundant species within distinct taxa/OTUs**

| Genus                    | Species                     | Reference                               |
|--------------------------|-----------------------------|-----------------------------------------|
| <i>Agathobaculum</i>     | <i>butyriciproducens</i>    | GCF_003096535.1_ASM309653v1             |
| <i>Agathobaculum</i>     | <i>desmolans</i>            | GCF_000701665.1_ASM70166v1              |
| <i>Alistipes</i>         | <i>finegoldii</i>           | NC_018011.1                             |
| <i>Alistipes</i>         | <i>onderdonkii</i>          | NZ_AP019734.1                           |
| <i>Alistipes</i>         | <i>timonensis</i>           | GCF_900107675.1_IMG-taxon_2693429854    |
| <i>Bacteroides</i>       | <i>coagulans</i>            | No reference available                  |
| <i>Bifidobacterium</i>   | <i>adolescentis</i>         | NZ_CP028341.1                           |
| <i>Bifidobacterium</i>   | <i>catenulatum</i>          | GCF_002075855.1_Bbif1899B               |
| <i>Bifidobacterium</i>   | <i>dentium</i>              | NZ_AP012326.1                           |
| <i>Bifidobacterium</i>   | <i>faecale</i>              | No reference available                  |
| <i>Bifidobacterium</i>   | <i>kashiwanohense</i>       | No reference available                  |
| <i>Bifidobacterium</i>   | <i>pseudocatenulatum</i>    | GCF_003952825.1_ASM395282v1             |
| <i>Bifidobacterium</i>   | <i>stercoris</i>            | Synonym to <i>B. adolescentis</i>       |
| <i>Blautia</i>           | <i>faecis</i>               | GCF_013302415.1_ASM1330241v1            |
| <i>Blautia</i>           | <i>luti</i>                 | GCF_013304735.1_ASM1330473v1            |
| <i>Blautia</i>           | <i>obeum</i>                | NZ_DS264342.1                           |
| <i>Blautia</i>           | <i>wexlerae</i>             | NZ_CYZN01000001.1                       |
| <i>Butyricoccus</i>      | <i>faecihominis</i>         | GCF_008830385.1_ASM883038v1             |
| <i>Casaltella</i>        | <i>massiliensis</i>         | No reference available                  |
| <i>Clostridium</i>       | <i>glycyrrhizinilyticum</i> | No reference available                  |
| <i>Dorea</i>             | <i>formicigenerans</i>      | GCF_000169235.1_ASM16923v1              |
| <i>Enterococcus</i>      | <i>durans</i>               | NZ_CP022930.1                           |
| <i>Enterococcus</i>      | <i>faecalis</i>             | NC_004668.1                             |
| <i>Enterococcus</i>      | <i>faecium</i>              | NZ_CP039729.1                           |
| <i>Enterococcus</i>      | <i>hirae</i>                | NZ_CP023011.2                           |
| <i>Enterococcus</i>      | <i>ratti</i>                | GCF_001886195.1_ASM188619v1             |
| <i>Enterococcus</i>      | <i>villorum</i>             | GCF_000407205.1_EnTe_vill_ATCC700913_V2 |
| <i>Eubacterium</i>       | <i>eligens</i>              | NC_012778.1                             |
| <i>Eubacterium</i>       | <i>hallii</i>               | NZ_LT907978.1                           |
| <i>Finegoldia</i>        | <i>magna</i>                | NC_010376.1                             |
| <i>Intestinibacillus</i> | <i>massiliensis</i>         | GCF_900155735.1_ASM90015573v1           |
| <i>Lactonifactor</i>     | <i>longoviformis</i>        | GCF_900129135.1_IMG-taxon_2585428044    |
| <i>Odoribacter</i>       | <i>splanchnicus</i>         | NC_015160.1                             |
| <i>Porphyromonas</i>     | <i>asaccharolytica</i>      | NC_015501.1                             |
| <i>Porphyromonas</i>     | <i>bennonis</i>             | GCF_000375645.1_ASM37564v1              |
| <i>Porphyromonas</i>     | <i>uenonis</i>              | GCF_000482365.1_ASM48236v1              |
| <i>Roseburia</i>         | <i>inulinivorans</i>        | GCF_000174195.1_ASM17419v1              |
| <i>Ruminococcus</i>      | <i>bromii</i>               | GCF_900101355.1_IMG-taxon_2593339225    |
| <i>Ruminococcus</i>      | <i>faecis</i>               | GCF_001312505.1_ASM131250v1             |

*Ruminococcus lactaris* GCF\_000155205.1\_ASM15520v1

*Ruminococcus torques* GCF\_000153925.1\_ASM15392v1

---

323 Species associated with oligotypes identified after LEfSe analysis when comparing patients  
324 developing CDI with all others at baseline (Supplementary Table 6) were utilized to create a  
325 manual Kraken 2 database utilizing the genomes in the table as references. Where available,  
326 complete genomes were utilized, otherwise an assembly or shotgun metagenomic sequences  
327 were utilized.

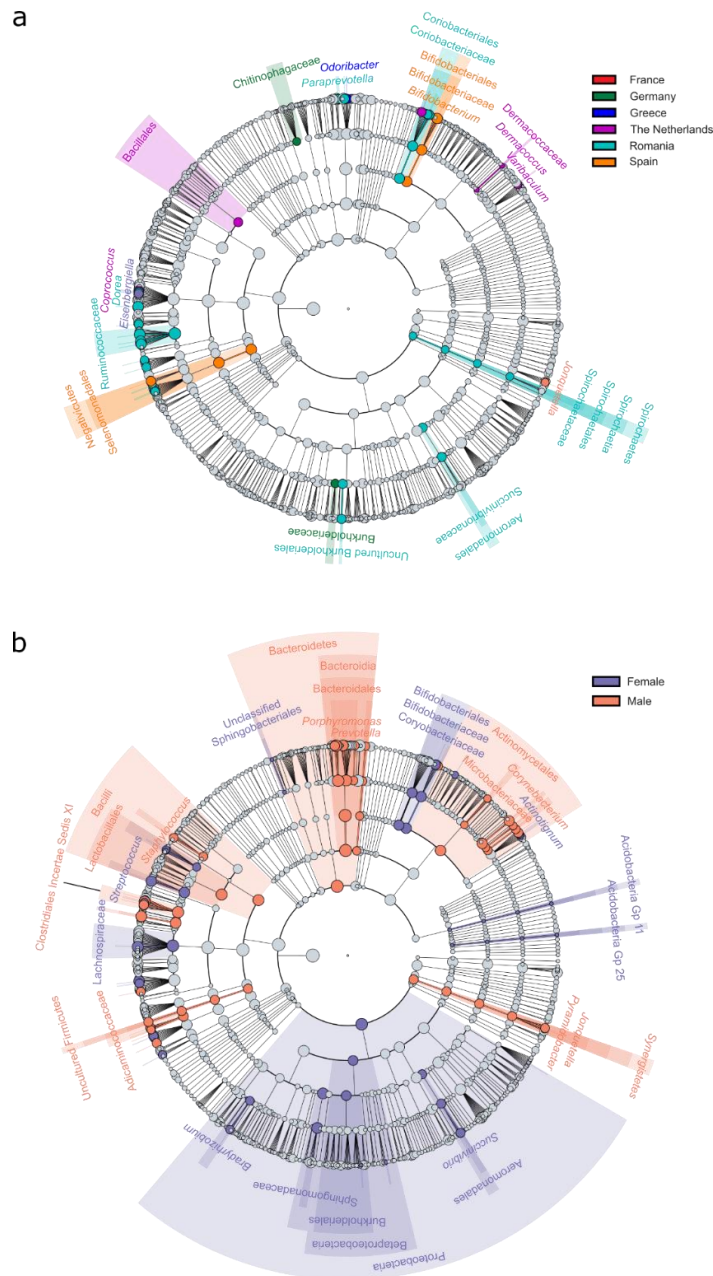

329

330 **Supplementary Figure 1: Identification of country- and gender-specific microbial markers**  
 331 **of the intestinal microbiota in hospitalized patients.** Differences in the microbiota were  
 332 assessed at D1 (n = 945) prior to antibiotic treatment in patients stratified by baseline  
 333 characteristics. **a** Cladogram generated by LefSe demonstrating distinctly higher abundances  
 334 (LDA > 2.0) stratified by country of residence of the participating countries France (n = 210,  
 335 red), Germany (n = 145, green), Greece (n = 85, blue), the Netherlands (n = 14, light purple),  
 336 Romania (n = 184, light blue), or Spain (n = 307, orange). For more details, see  
 337 Supplementary Figure 2. **b** Cladogram generated by LefSe demonstrating distinctly higher  
 338 abundances (LDA > 2.0) stratified by male (n = 557, salmon) or female (n = 388, purple)  
 339 gender of the enrolled patients. For more details, see Supplementary Figure 3. M: Male. F:

340 Female. FR: France. GE: Germany. GR: Greece. NL: the Netherlands. RO: Romania. SP:  
341 Spain. LEfSe: Linear discriminant analysis effect size. LDA: Linear discriminant analysis  
342 score.

Germany Greece France NL Romania Spain

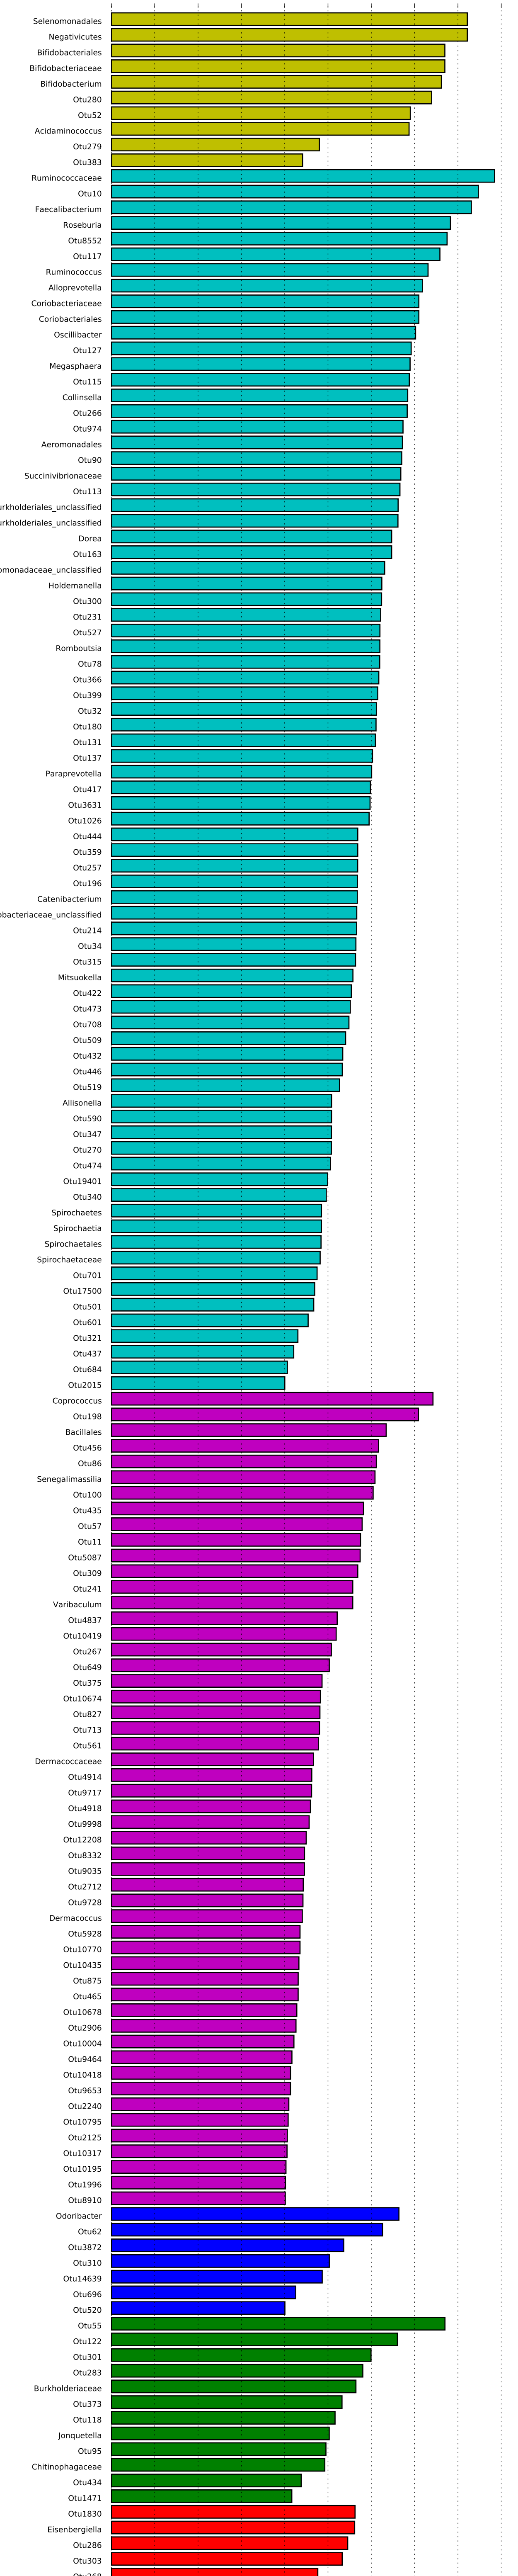

Supplementary Figure 2: Identification of microbial markers in the intestinal microbiota of hospitalized patients stratified by country of origin. Differences in the microbiota were assessed at D1 (n = 945) prior to antibiotic treatment. The bar plot generated by LEfSe demonstrates higher abundances (LDA > 2.0) in patients hospitalized in France (n = 210), Germany (n = 145), Greece (n = 85), the Netherlands (n = 14), Romania (n = 184), or Spain (n = 307). For more details, see Supplementary Figure 1a.



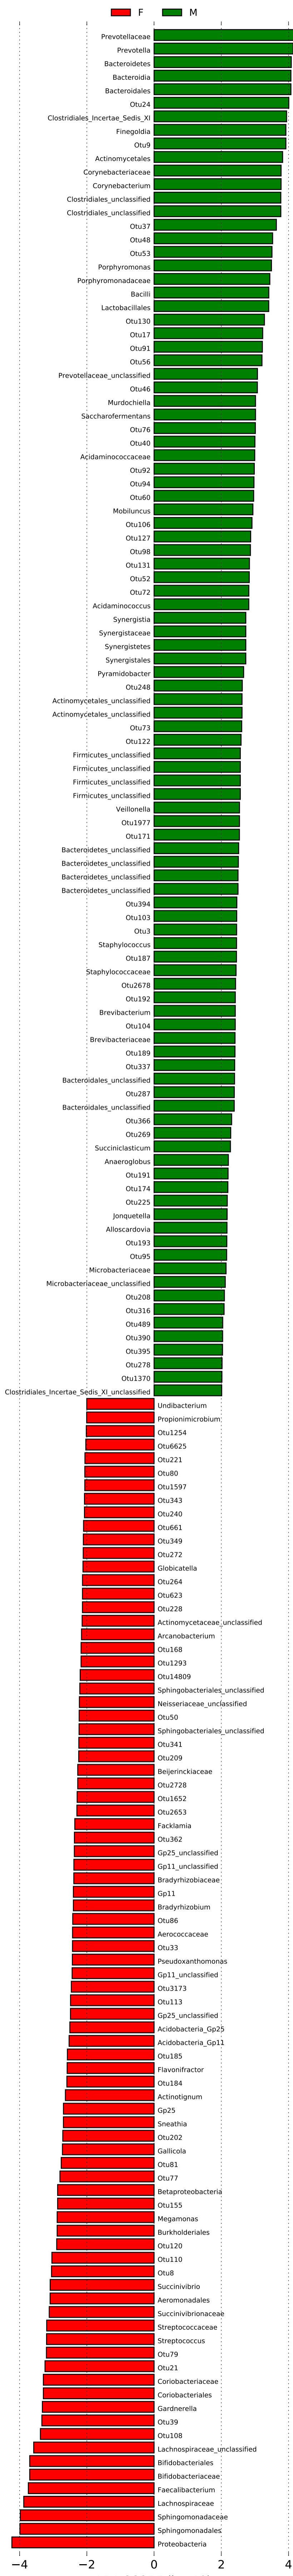

Supplementary Figure 3: Identification of microbial markers in the intestinal microbiota of hospitalized patients stratified by gender. Differences in the microbiota were assessed at D1 (n = 945) prior to antibiotic treatment. The bar plot generated by LEfSe shows higher abundances of taxa (LDA > 2.0) in male (n = 557 and female (n = 388) patients. For more details, see Supplementary Figure 1b. M: Male. F: Female.

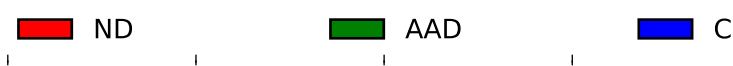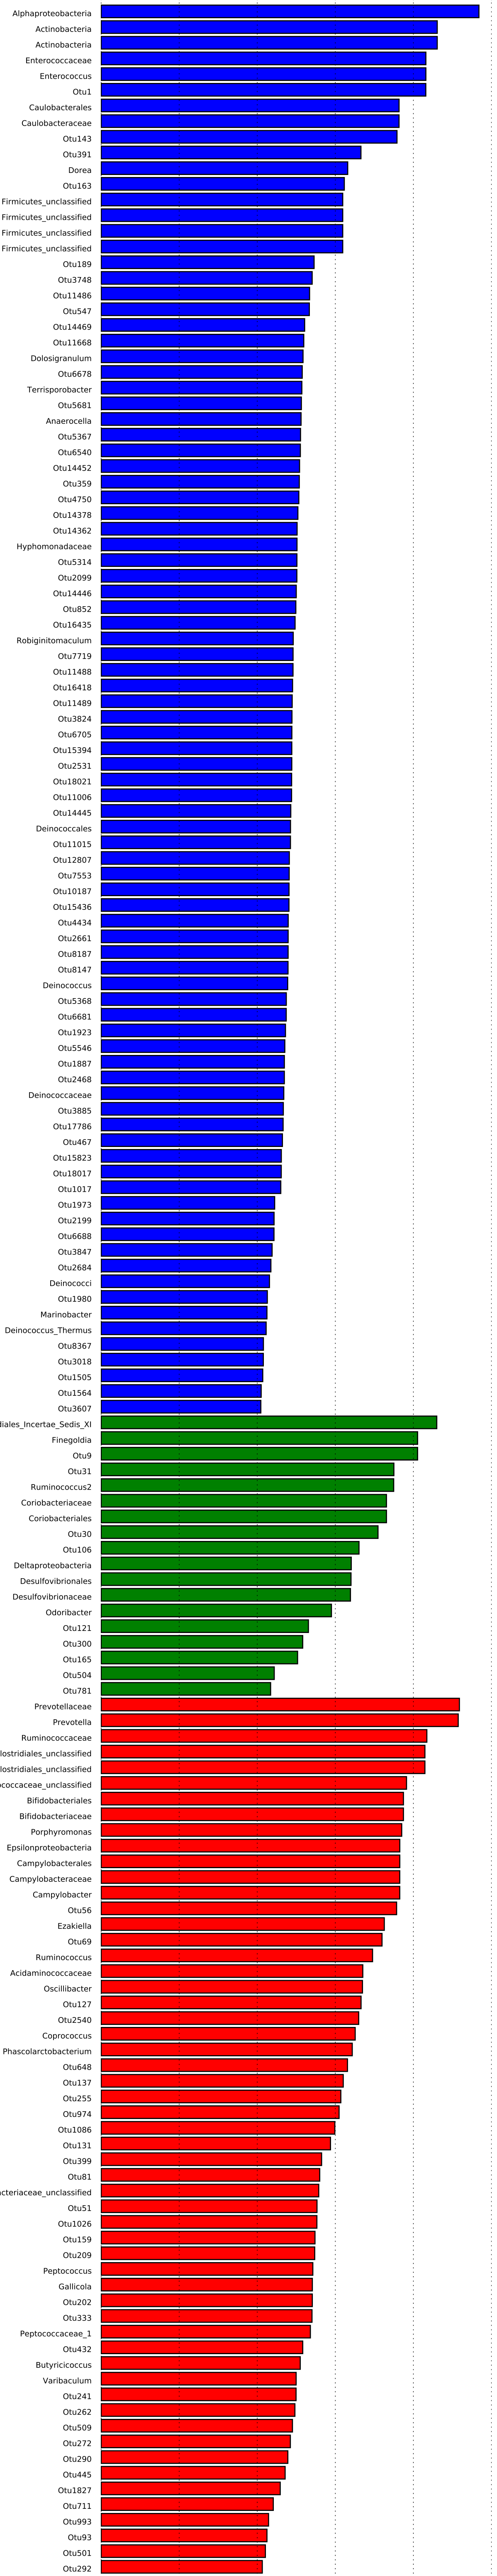

Supplementary Figure 4. **Characterization of microbial diversity in baseline (D1) samples.** Differences in the intestinal microbiota were assessed in patients developing CDI (n = 14), AAD (n = 64), and in ND patients (n = 669). The bar plot generated by LEfSe demonstrates higher abundances of *Actinobacteria*, *Alphaproteobacteria* and *Enterococcus* spp. in the intestinal microbiota of CDI patients at baseline (D1) compared to AAD and ND patients. For more details, see Figure 3c.

D1 S1

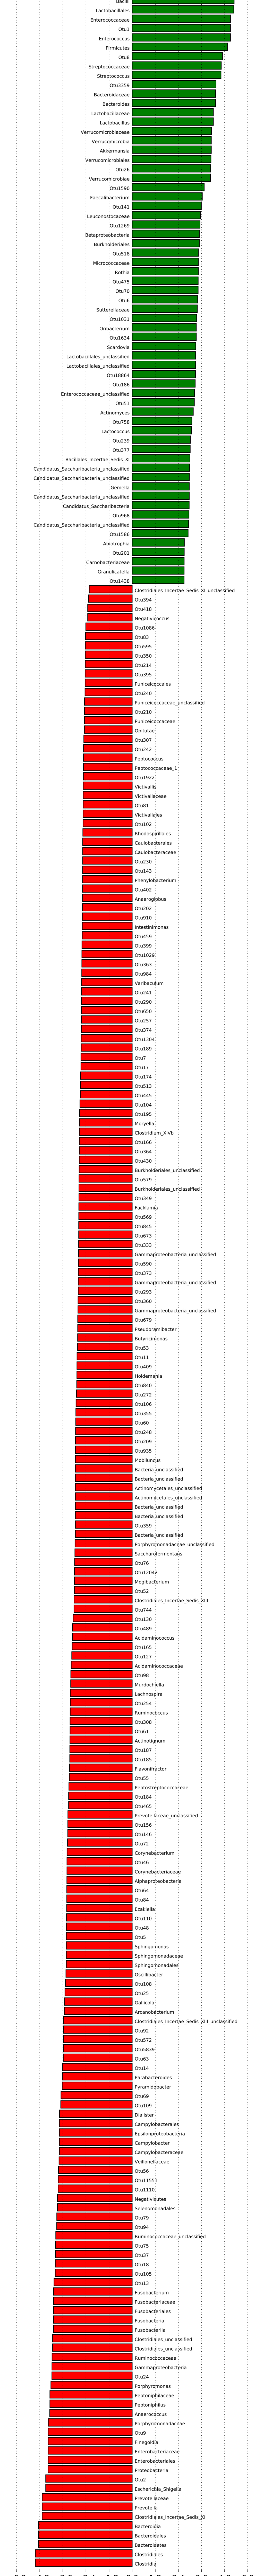

Supplementary Figure 5: Longitudinal analysis of microbial diversity and dysbiosis in patients developing AAD. Microbial composition in patients developing AAD (n = 26) was assessed at D1 and S1. Comparison of the microbiota composition at D1 and S1 conducted using LEfSe (LDA > 2.0) shows large changes in the Firmicutes and Proteobacteria phyla for AAD patients. Proteobacteria are significantly reduced and a shift is observed from the Clostridia to Bacilli class at occurrence of AAD (S1). For more details, see Figure 5d.

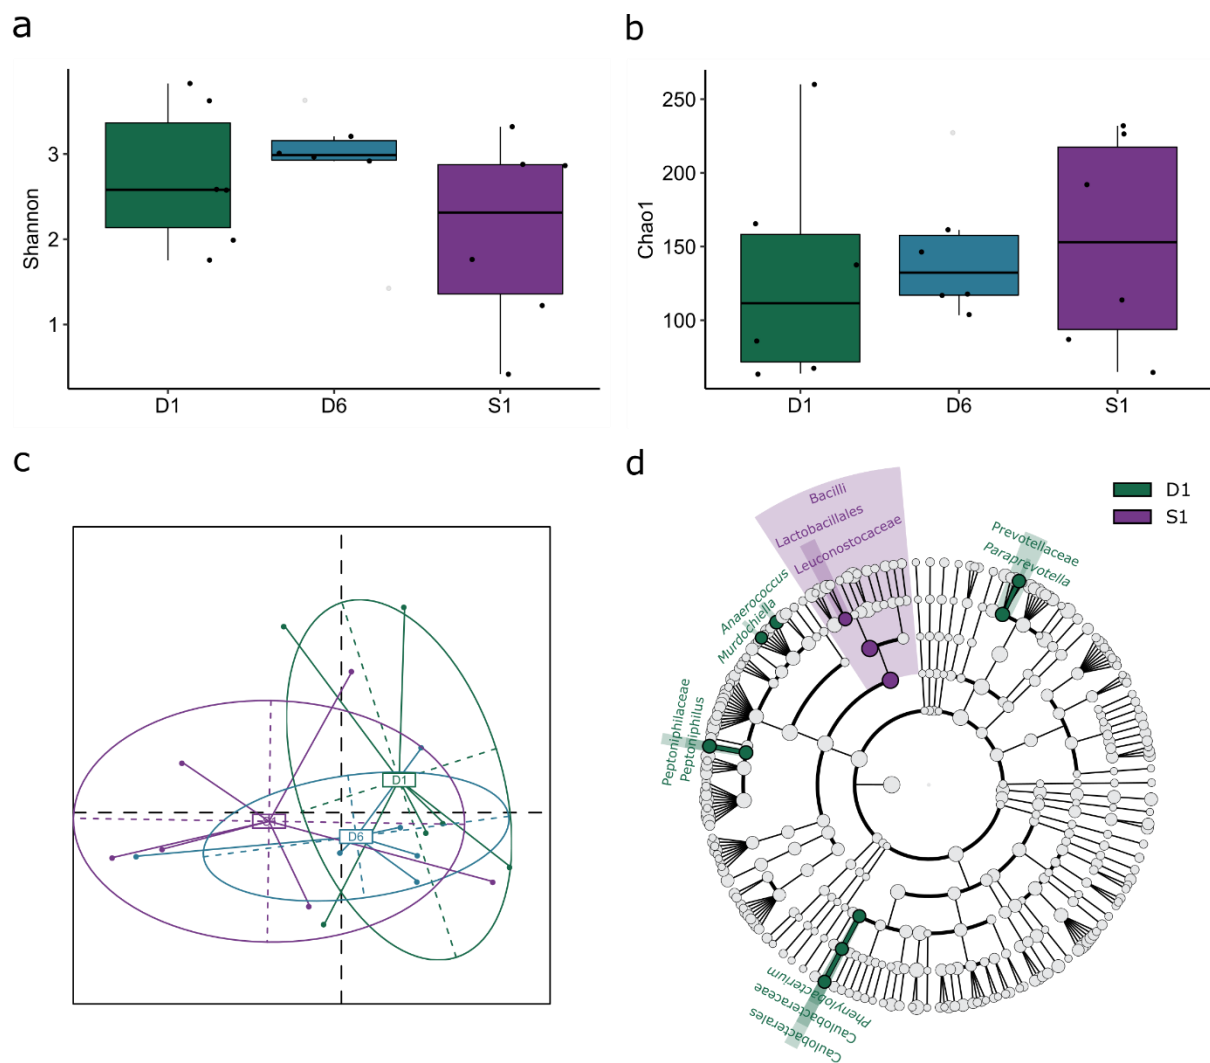

343

344 **Supplementary Figure 6. Longitudinal analysis of microbial diversity and dysbiosis in**  
 345 **patients developing CDI.** Microbial diversity and composition in patients developing CDI in  
 346 the study population (n = 6) was assessed at D1 (green), D6 (blue), S1 (purple). Although a  
 347 gradual decrease was observed in both Shannon and Chao1 diversity in AAD patients (n = 26)  
 348 between sampling timepoints (Figure 5a-b), no such trend was observed in **a** Shannon or **b**  
 349 Chao1 diversity in patients developing CDI. **c** Multi-dimensional scaling (MDS) revealed a  
 350 non-significant trend toward differing microbial communities when comparing composition at  
 351 different sampling timepoints in CDI patients. **d** Comparison of the D1 and the S1 microbiota  
 352 conducted using LefSe (LDA > 2.0) shows few distinct changes for CDI patients, likely due  
 353 to the small sample size. For more details, see Supplementary Figure 7. Alpha diversity  
 354 indices were compared using the paired two-sided non-parametric Wilcoxon signed rank test  
 355 followed by Bonferroni correction of p-values. Box plots indicate median (middle line), 25<sup>th</sup>,  
 356 75<sup>th</sup> percentile (box), and 5<sup>th</sup> and 95<sup>th</sup> percentile (whiskers) as well as outliers (gray single  
 357 dots). CDI: patients with confirmed *C. difficile* infection.

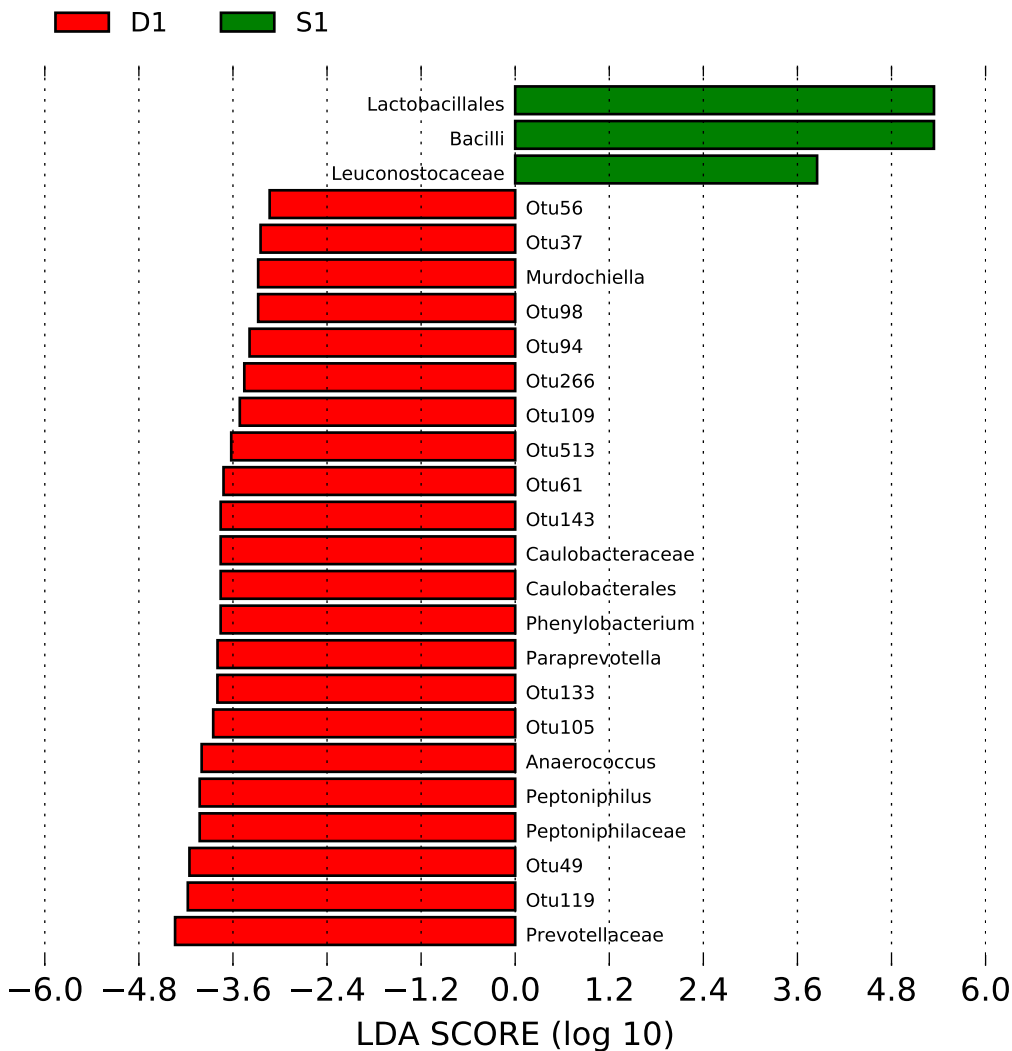

Supplementary Figure 7: **Longitudinal analysis of microbial diversity and dysbiosis in patients developing CDI.** Microbial composition in patients developing CDI (n = 6) was assessed at D1 and S1. Comparison of the D1 and S1 microbiota conducted using LEfSe (LDA > 2.0) shows few distinct changes. For more details, see Supplementary Figure 6d.

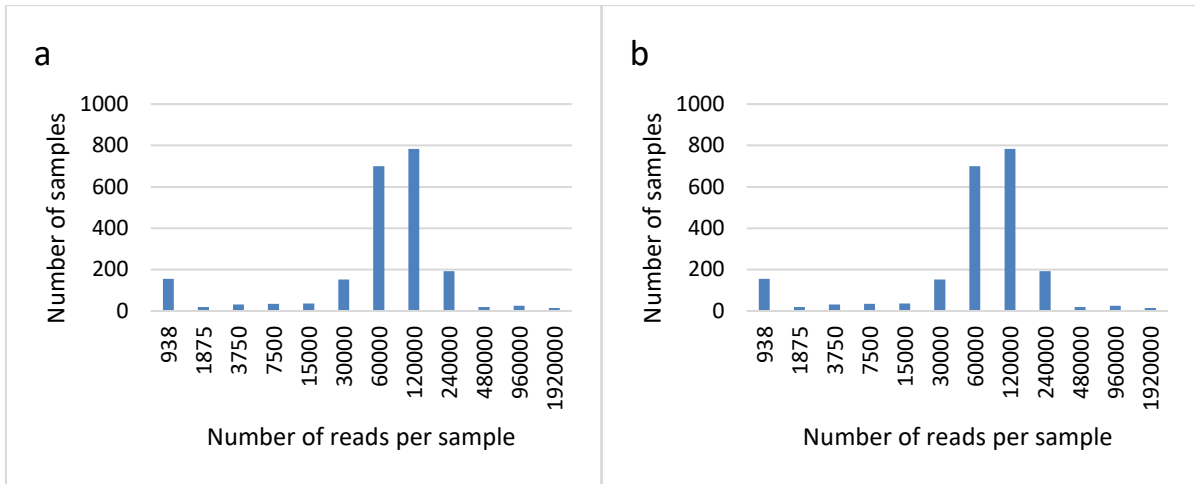

358

359 **Supplementary Figure 8: Distribution of raw and processed reads.** **a** Number of raw reads  
 360 per sample across all sequenced samples in the study. **b** Number of processed reads per  
 361 sample across all sequenced samples in the study.

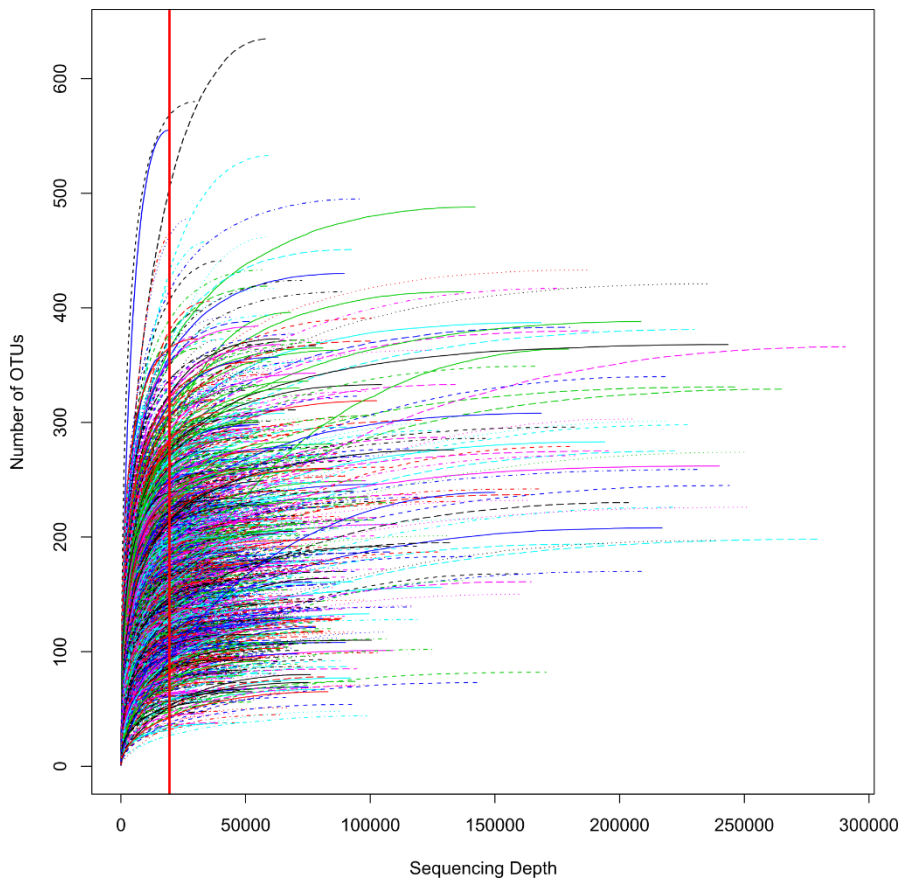

362

363 **Supplementary Figure 9: Rarefaction curves for sequenced samples in the study.**  
 364 Rarefaction curves were calculated in mothur for all sequenced samples in the study (n =  
 365 1714). Based on these calculations, a sub-sampling depth of 15,000 was applied on all  
 366 samples and is indicated in the figure with a red line.

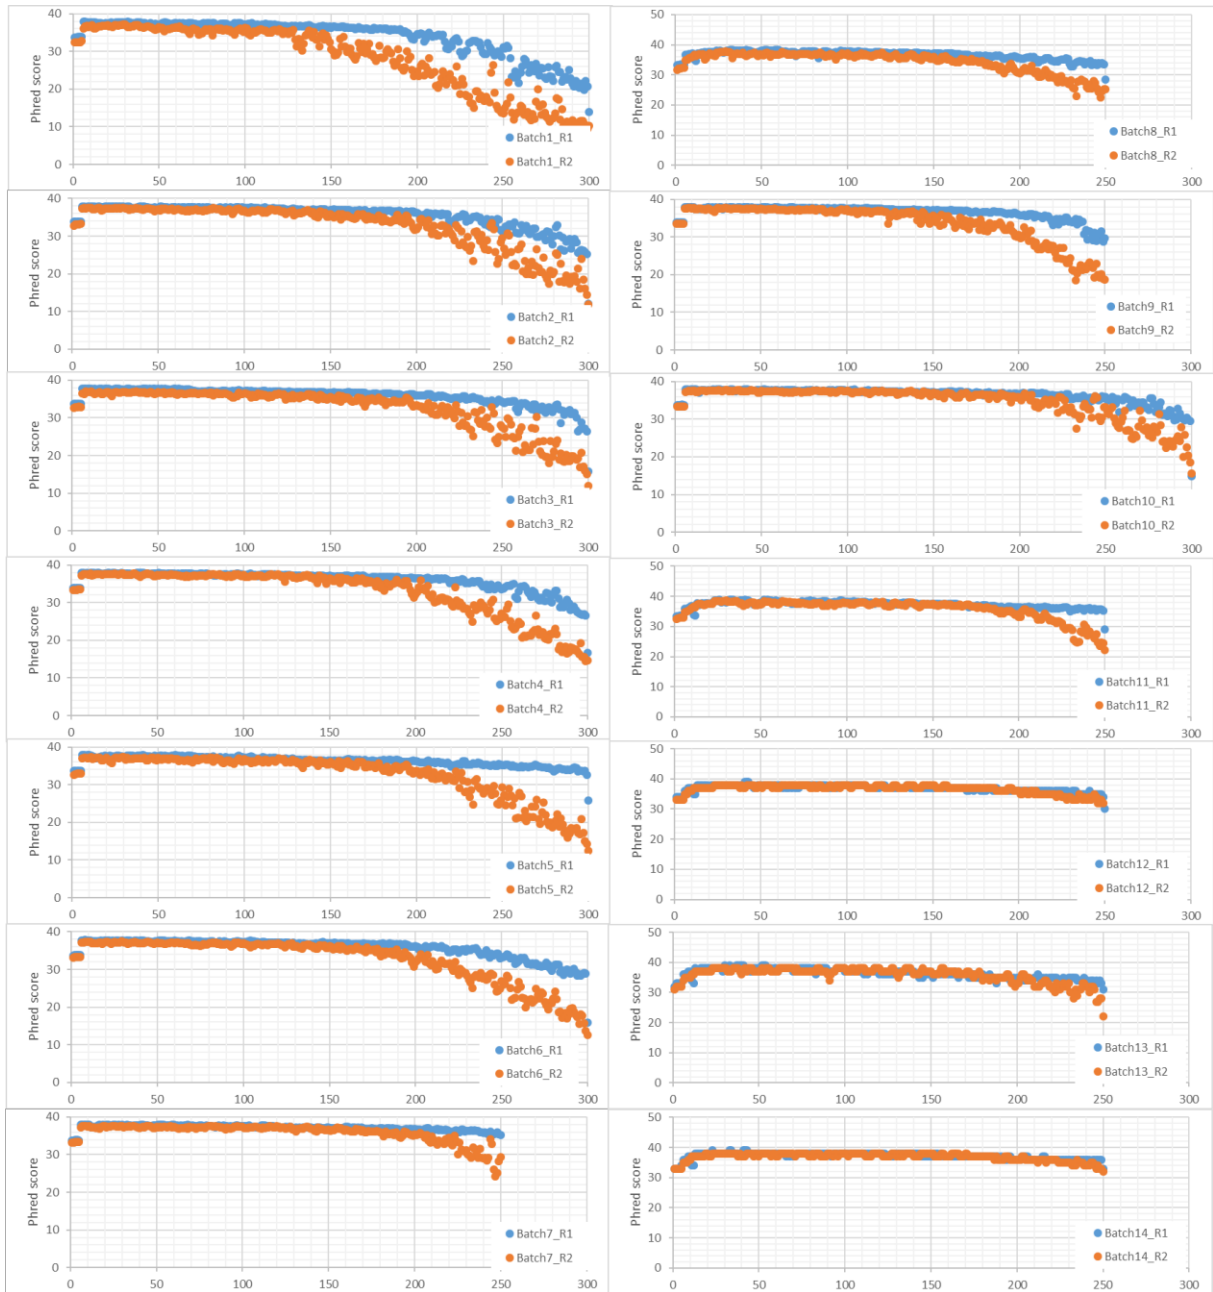

367

368 **Supplementary Figure 10: Per-base Phred scores across sequencing batches.**

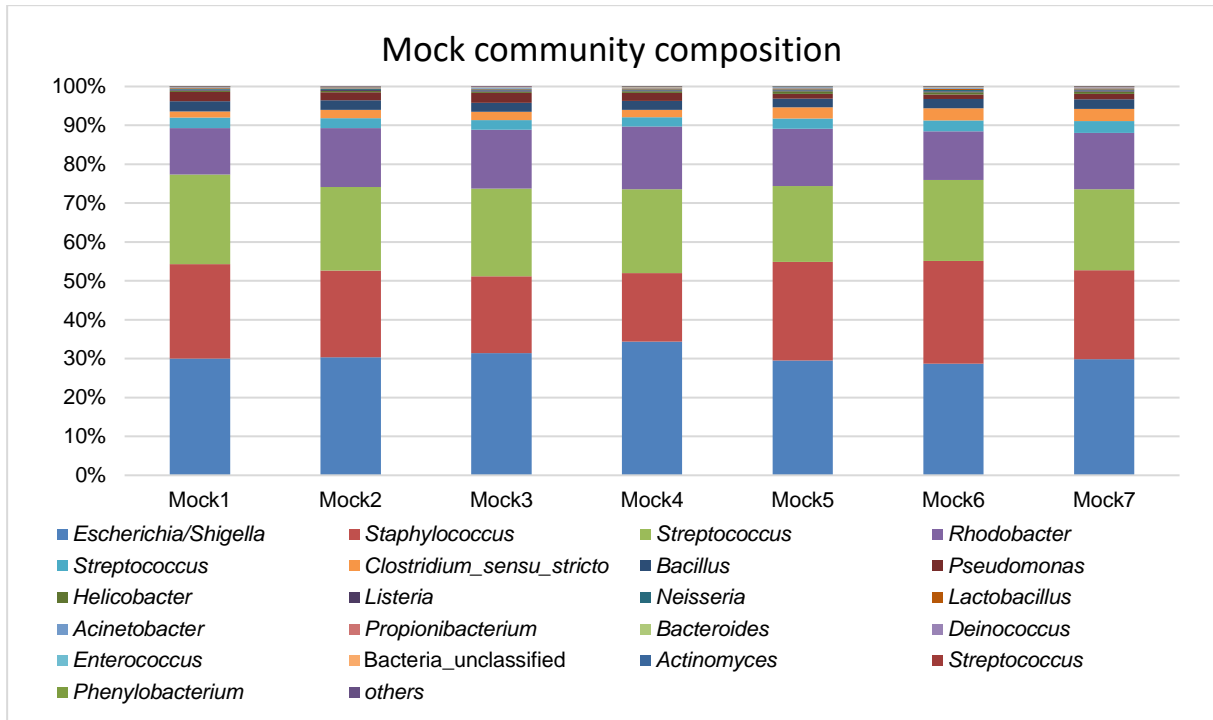

369

370 **Supplementary Figure 11: Relative abundance of detected taxa in mock communities.**

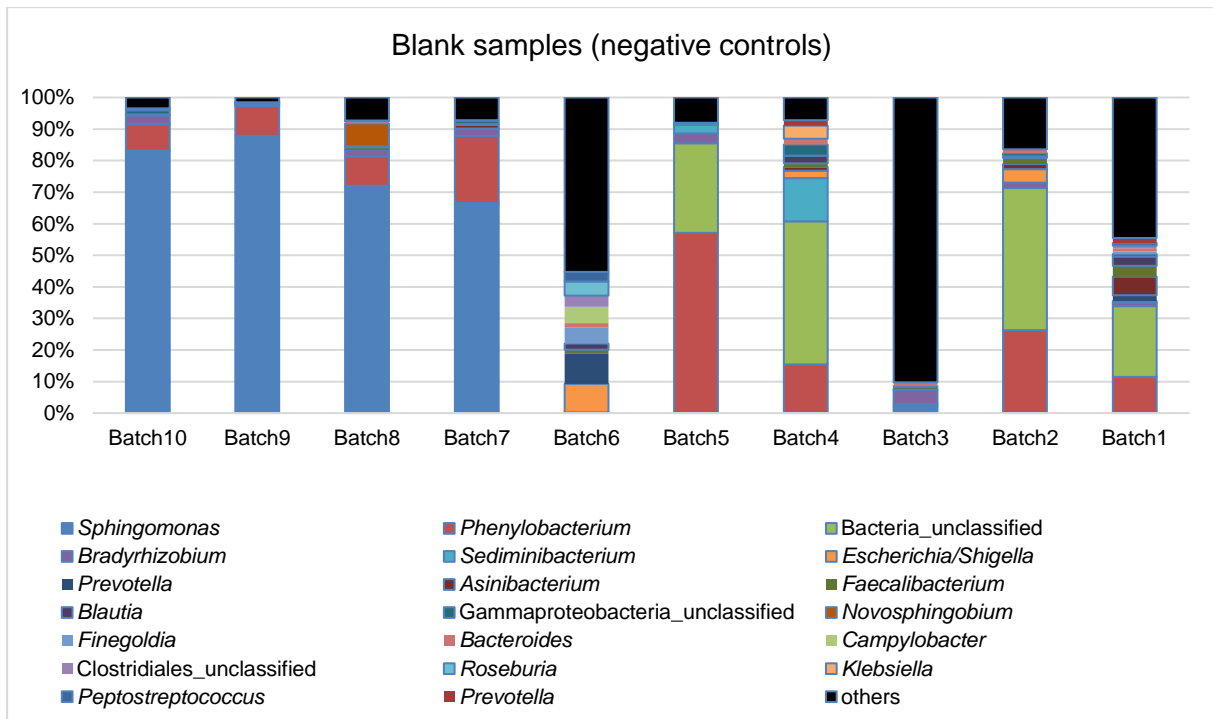

371

372 **Supplementary Figure 12: Relative abundances of detected taxa in negative control**  
 373 **samples.**



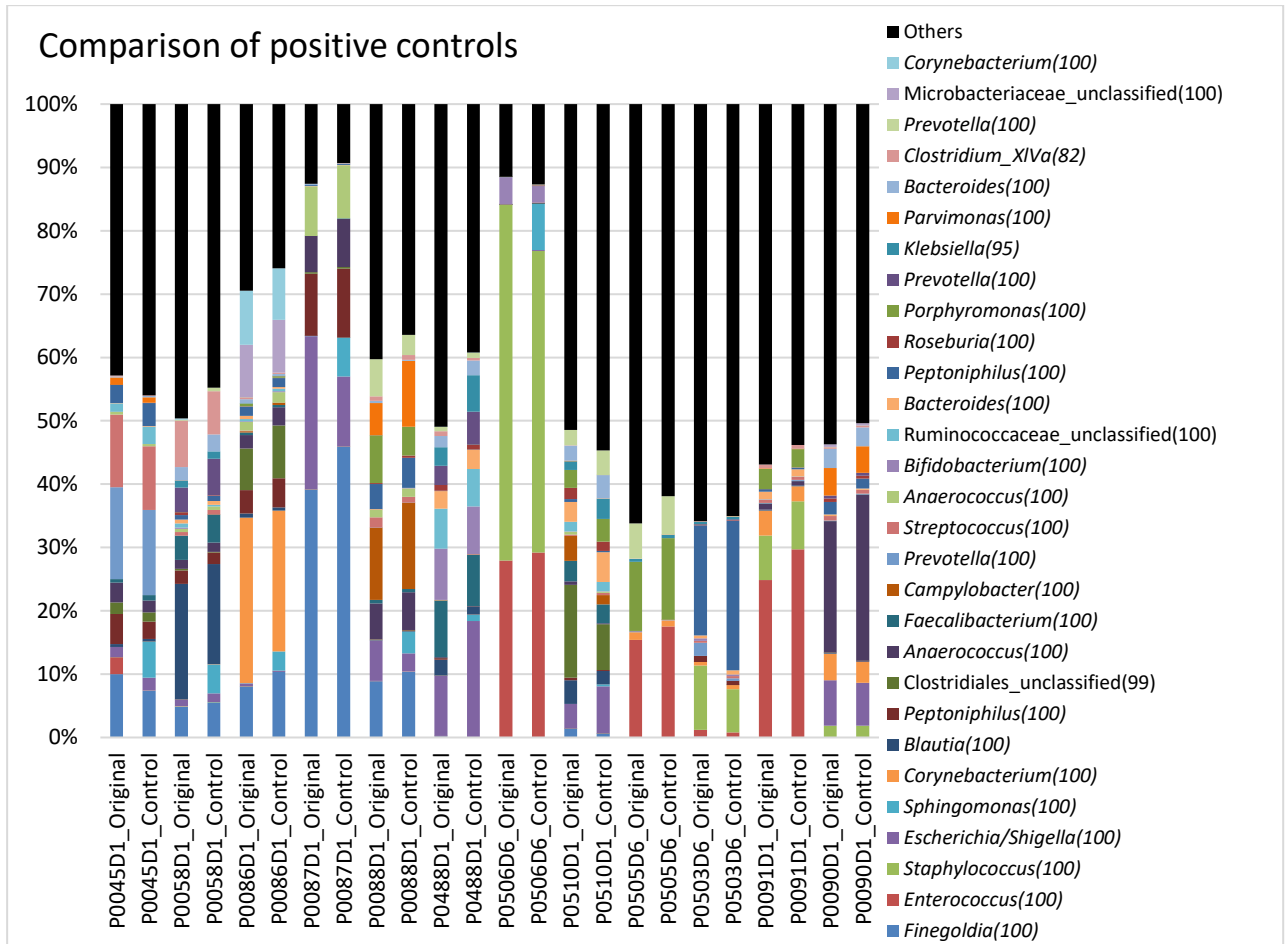

374

375 **Supplementary Figure 13: Relative abundances of positive patient sample controls.**

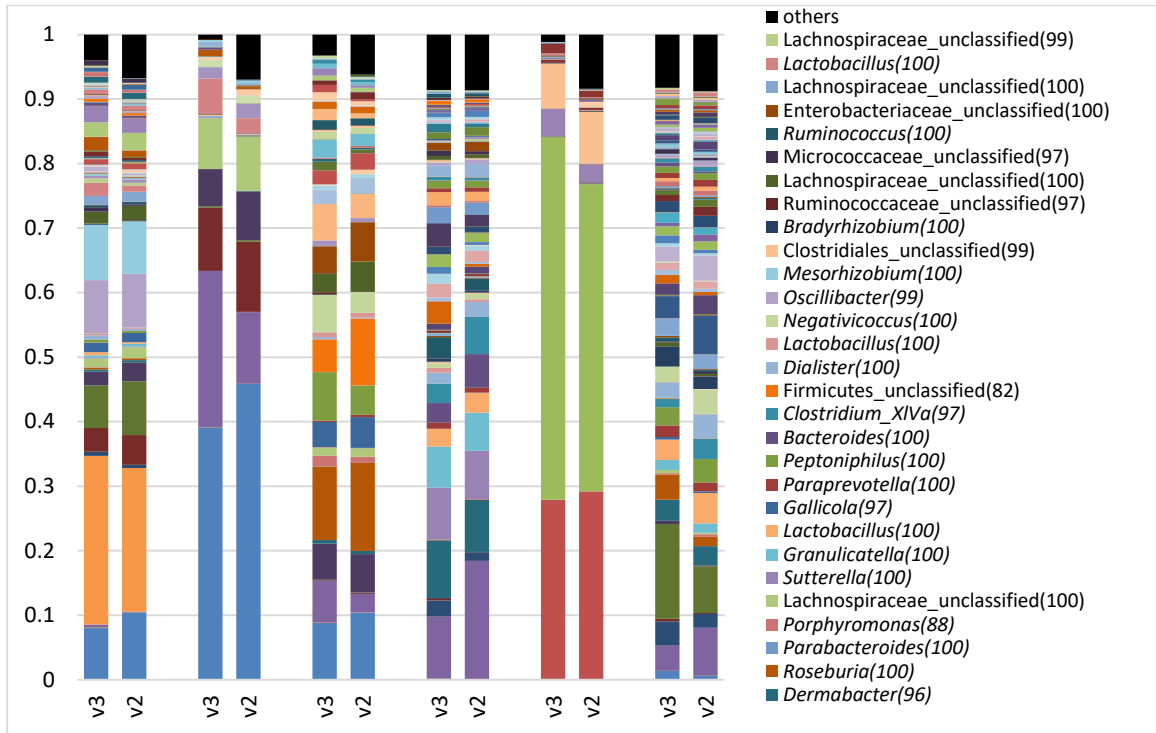

376  
377  
378

Supplementary Figure 14: Relative abundances of detected taxa in positive sample controls sequenced with both V2 and V3 chemistry.

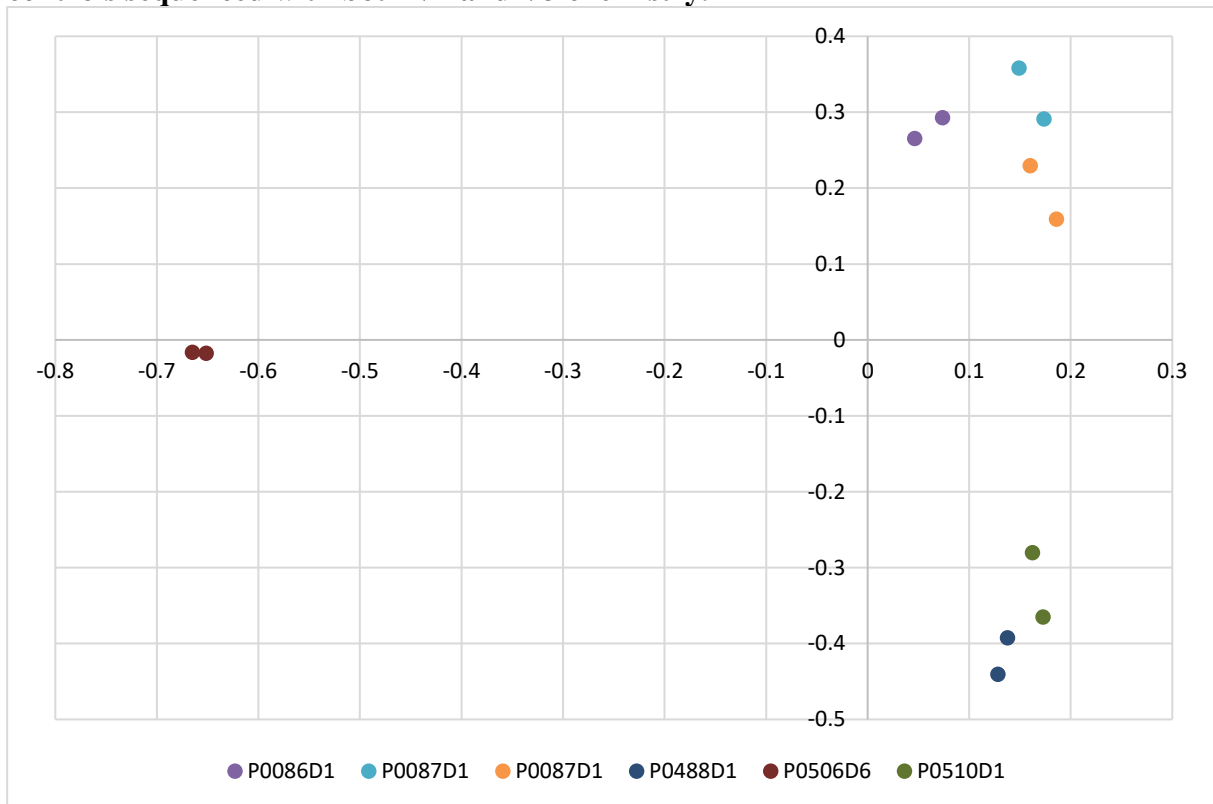

379  
380  
381

Supplementary Figure 15: Principle Coordinate Analysis plot visualizing beta diversity of positive sample controls sequenced with both V2 and V3 chemistry.

## 382 **Supplementary References**

- 383 1. Edgar, R. C. Updating the 97% identity threshold for 16S ribosomal RNA OTUs. *Bioinformatics* **34**, 2371–  
384 2375 (2018).
- 385 2. Smits, W. K., Lyras, D., Lacy, D. B., Wilcox, M. H. & Kuijper, E. J. *Clostridium difficile* infection. *Nat.*  
386 *Rev. Dis. Prim.* **2**, 16020 (2016).
- 387 3. Eren, A. M. *et al.* Oligotyping: Differentiating between closely related microbial taxa using 16S rRNA  
388 gene data. *Methods Ecol. Evol.* **4**, 1111–1119 (2013).
- 389 4. McTeague, M., Finegold, S., Summanen, P., Liu, C. & Song, Y. *Clostridium bartlettii* sp. nov., isolated  
390 from human faeces. *Anaerobe* **10**, 179–184 (2004).
- 391 5. Lawley, T. D. *et al.* Proteomic and genomic characterization of highly infectious *Clostridium difficile* 630  
392 spores. *J. Bacteriol.* **191**, 5377–5386 (2009).
- 393 6. Galperin, M. Y., Brover, V., Tolstoy, I. & Yutin, N. Phylogenomic analysis of the family  
394 peptostreptococcaceae (*Clostridium* cluster xi) and proposal for reclassification of *Clostridium litorale*  
395 (Fendrich *et al.* 1991) and *Eubacterium acidaminophilum* (Zindel *et al.* 1989) as peptoclostridium litorale  
396 gen. nov. *Int. J. Syst. Evol. Microbiol.* **66**, 5506–5513 (2016).
- 397 7. Callahan, B. J. *et al.* DADA2: High resolution sample inference from Illumina amplicon data. *Nature*  
398 *Methods* **13**, 581–583 (16AD).
- 399 8. Daquigan, N., Seekatz, A. M., Greathouse, K. L., Young, V. B. & White, J. R. High-resolution profiling  
400 of the gut microbiome reveals the extent of *Clostridium difficile* burden. *npj Biofilms Microbiomes* **3**, 1–8  
401 (2017).
- 402 9. van Werkhoven, C. H. *et al.* Incidence and predictive biomarkers of *Clostridioides difficile* infections in  
403 hospitalized patients receiving broad-spectrum antibiotics: a prospective cohort study. *Nat. Commun.*  
404 (2021).
- 405 10. Salter, S. J. *et al.* Reagent and laboratory contamination can critically impact sequence-based microbiome  
406 analyses. *BMC Biol.* **12**, 1–12 (2014).
- 407 11. Kennedy, K., Hall, M. W., Lynch, M. D. J., Moreno-Hagelsieb, G. & Neufeld, J. D. Evaluating Bias of  
408 Illumina-Based Bacterial 16S rRNA Gene Profiles. *Appl. Environ. Microbiol.* **80**, 5717–5722 (2014).
- 409 12. Tremblay, J. *et al.* Primer and platform effects on 16S rRNA tag sequencing. *Front. Microbiol.* **6**, 1–15  
410 (2015).
- 411 13. Sze, M. A. & Schloss, P. D. The Impact of DNA Polymerase and Number of Rounds of Amplification in  
412 PCR on 16S rRNA Gene Sequence Data. *mSphere* **4**, 1–13 (2019).
- 413 14. Kobschull, J. M. & Zador, A. M. Sources of PCR-induced distortions in high-throughput sequencing data  
414 sets. *Nucleic Acids Res.* **43**, 1–15 (2015).
- 415 15. Vincent, C. *et al.* Reductions in intestinal Clostridiales precede the development of nosocomial  
416 *Clostridium difficile* infection. *Microbiome* **1**, 1–11 (2013).
